# 1 Gut microbiota density influences host physiology and is shaped by host 2 and microbial factors

3 Eduardo J. Contijoch<sup>1,2</sup>, Graham J. Britton<sup>1,2</sup>, Chao Yang<sup>1,2</sup>, Ilaria Mogno<sup>1,2</sup>, Zhihua Li<sup>1,2</sup>, Ruby Ng<sup>1,2</sup>,  
4 Sean R. Llewellyn<sup>1,2</sup>, Sheela Hira<sup>3</sup>, Crystal Johnson<sup>4</sup>, Keren M. Rabinowitz<sup>5,6</sup>, Revital Barkan<sup>5</sup>, Iris  
5 Dotan<sup>5,7</sup>, Robert P. Hirten<sup>8</sup>, Shih-Chen Fu<sup>2</sup>, Yuying Luo<sup>8</sup>, Nancy Yang<sup>8</sup>, Tramy Luong<sup>2</sup>, Philippe R.  
6 Labrias<sup>2</sup>, Sergio A. Lira<sup>1</sup>, Inga Peter<sup>2</sup>, Ari Grinspan<sup>8</sup>, Jose C. Clemente<sup>1,2</sup>, Roman Kosoy<sup>2</sup>, Seunghee  
7 Kim-Schulze<sup>9</sup>, Xiaochen Qin<sup>1</sup>, Anabella Castillo<sup>8</sup>, Amanda Hurley<sup>2</sup>, Ashish Atreja<sup>8</sup>, Jason Rogers<sup>8</sup>,  
8 Farah Fasihuddin<sup>8</sup>, Merjona Saliaj<sup>8</sup>, Amy Nolan<sup>8</sup>, Pamela Reyes-Mercedes<sup>8</sup>, Carina Rodriguez<sup>8</sup>,  
9 Sarah Aly<sup>8</sup>, Kenneth Santa-Cruz<sup>8</sup>, Lauren A. Peters<sup>2,10,11</sup>, Mayte Suárez-Fariñas<sup>2</sup>, Ruiqi Huang<sup>2</sup>, Ke  
10 Hao<sup>2</sup>, Jun Zhu<sup>2</sup>, Bin Zhang<sup>2</sup>, Bojan Losic<sup>2</sup>, Haritz Irizar<sup>2</sup>, Won-Min Song<sup>2</sup>, Antonio Di Narzo<sup>2</sup>, Wenhui  
11 Wang<sup>2</sup>, Benjamin L. Cohen<sup>8</sup>, Christopher DiMaio<sup>8</sup>, David Greenwald<sup>8</sup>, Steven Itzkowitz<sup>8</sup>, Aimee  
12 Lucas<sup>8</sup>, James Marion<sup>8</sup>, Elana Maser<sup>8</sup>, Ryan Ungaro<sup>8</sup>, Steven Naymagon<sup>8</sup>, Joshua Novak<sup>8</sup>, Brijen  
13 Shah<sup>8</sup>, Thomas Ullman<sup>8</sup>, Peter Rubin<sup>8</sup>, James George<sup>8</sup>, Peter Legnani<sup>8</sup>, Shannon E Telesco<sup>12</sup>,  
14 Joshua R. Friedman<sup>12</sup>, Carrie Brodmerkel<sup>12</sup>, Scott Plevy<sup>12</sup>, Judy Cho<sup>8</sup>, Jean-Frederic Colombel<sup>8</sup>, Eric  
15 Schadt<sup>2,11</sup>, Carmen Argmann<sup>2</sup>, Marla Dubinsky<sup>13</sup>, Andrew Kasarskis<sup>2</sup>, Bruce Sands<sup>8</sup>, Jeremiah J.  
16 Faith<sup>1,2,14\*</sup>

- 17 1. Precision Immunology Institute, Icahn School of Medicine at Mount Sinai, New York, NY, 10029,  
18 USA
- 19 2. Icahn Institute for Genomics and Multiscale Biology, Icahn School of Medicine at Mount Sinai,  
20 New York, NY, 10029, USA
- 21 3. Zoo Knoxville, Knoxville, TN, 37914, USA
- 22 4. Center for Comparative Medicine and Surgery, Icahn School of Medicine at Mount Sinai, New  
23 York, NY, 10029, USA
- 24 5. Division of Gastroenterology, Rabin Medical Center, Beilinson Campus, Petah Tikva, 4941492,  
25 Israel
- 26 6. Felsenstein Medical Research Center, Sackler Faculty of Medicine, Tel Aviv University, Tel Aviv  
27 6997801 Israel
- 28 7. Sackler Faculty of Medicine, Tel Aviv University, Tel Aviv 6997801, Israel
- 29 8. The Dr. Henry D. Janowitz Division of Gastroenterology, Icahn School of Medicine at Mount  
30 Sinai, New York, NY, 10029, USA
- 31 9. Division of Hematology and Medical Oncology, The Tisch Cancer Institute, Icahn School of  
32 Medicine at Mount Sinai, New York, NY, 10029, USA
- 33 10. Department of Genetics & Genomic Sciences, Icahn School of Medicine at Mount Sinai, New  
34 York, NY, 10029, USA

- 35 11. Sema4, a Mount Sinai venture, Stamford, CT, 06902, USA
- 36 12. Janssen Research and Development, LLC., Spring House, Pennsylvania, 19002, USA
- 37 13. Pediatric Gastroenterology and Hepatology, Department of Pediatrics, Susan and Leonard  
38 Feinstein IBD Clinical Center, Icahn School of Medicine at Mount Sinai, New York, NY, 10029,  
39 USA
- 40 14. Lead Contact
- 41 \*Correspondence: jeremiah.faihth@mssm.edu

42

---

## 43 **Summary**

44 To identify factors that regulate gut microbiota density and the impact of varied microbiota density on  
45 health, we assayed this fundamental ecosystem property in fecal samples across mammals, human  
46 disease, and therapeutic interventions. Physiologic features of the host (carrying capacity) and the  
47 fitness of the gut microbiota shape microbiota density. Therapeutic manipulation of microbiota density  
48 in mice altered host metabolic and immune homeostasis. In humans, gut microbiota density was  
49 reduced in Crohn's disease, ulcerative colitis, and ileal pouch-anal anastomosis. The gut microbiota in  
50 recurrent *Clostridium difficile* infection had lower density and reduced fitness that were restored by  
51 fecal microbiota transplantation. Understanding the interplay between microbiota and disease in terms  
52 of microbiota density, host carrying capacity, and microbiota fitness provide new insights into  
53 microbiome structure and microbiome targeted therapeutics.

## 54 **Introduction**

55 Population density is a fundamental parameter in understanding the health and function of any  
56 ecosystem, yet we know little about which host and microbial factors contribute to the density of  
57 organisms in the gut microbiota (i.e., gut microbiota density). The relationships uncovered between  
58 the gut microbiota and health over the past decade have largely focused on relative differences in  
59 community composition, estimated with culture-independent 16S rRNA gene (1, 2) or shotgun  
60 metagenomic sequencing (3). The microbiome's influence on host physiology likely depends on the  
61 number – and not just the type – of bacteria interfacing with the host. Therefore, understanding factors  
62 driving gut microbiota density, as well as the impact of microbiota density on health, may advance the  
63 therapeutic potential of the microbiota.

64 Microbiota density has previously been measured with colony-forming units, DNA spike-ins (4,  
65 5), qPCR (6, 7), flow cytometry (8–10), and microbial DNA quantification (microbial DNA per mass of  
66 sample) (9, 11, 12). Here, we use fecal microbial DNA content to estimate gut microbiota density,

67 since it correlates with flow cytometry counts and colony forming units (CFU), and it can be easily  
68 incorporated into standard microbiome sequencing workflows by weighing the sample (9). We  
69 investigate host and microbial factors that contribute to microbiota density across a diverse set of  
70 mammalian microbiomes, study the impact of microbiota density on host adiposity and immune  
71 function in controlled mice models, and describe microbiota density changes in disease and the  
72 resolution of those alterations after therapy.

## 73 **Results**

### 74 **The natural variation of gut microbiota density in mammals is driven by host and microbial** 75 **factors**

76 In macroecology, carrying capacity is the maximal density of organisms supported by an ecosystem  
77 and is broadly dictated by the resources (e.g. food, water, and habitat) in the environment. Whether or  
78 not the collection of species in an environment can reach the carrying capacity depends on their  
79 ability to efficiently utilize the available resources (i.e., the community's fitness for the environment).  
80 To explore the contribution of host carrying capacity and gut microbiota fitness to microbiota density,  
81 we first collected fecal material from sixteen different mammalian species (Table S1) in order to  
82 sample a diverse range of host intestinal architectures and gut microbial community compositions.  
83 Using methods optimized to assay fecal microbiota density with greater throughput (see Methods and  
84 Figure S1), we observed significant differences in microbiota density across the mammalian samples  
85 ( $H = 69.0$ ,  $p = 6.72 \times 10^{-9}$ ; Kruskal-Wallis) with a 216-fold difference between the median of the most  
86 dense and least dense gut microbiota (Figure 1A). We found a positive correlation between microbiota  
87 density and phylogenetic relatedness of the host ( $R^2 = 0.191$ ;  $p = 0.0368$ ; Pearson; Figure 1B), while  
88 there was no correlation between microbiota density and either fecal water content ( $\rho = -0.0418$ ,  $p =$   
89  $0.892$ , Spearman; Figure 1C) or host size (mass) ( $\rho = -0.364$ ,  $p = 0.167$ , Spearman; Figure S2).  
90 Animals from order *Carnivora* (dog, ferret, lion, red panda, and tiger), with simple gut architectures  
91 adapted to carnivorous diets, had significantly reduced microbiota densities compared with the rest of  
92 the mammals studied ( $p = 6.14 \times 10^{-10}$ , Mann-Whitney, Figure 1D).

93 To assay the relative contributions of the host (i.e., carrying capacity) and the microbiota (i.e.,  
94 microbiota fitness) to microbiota density, we utilized germ-free mice with controlled host carrying  
95 capacity (i.e., fixed diet, genetics, and environment) transplanted with the microbiotas of different  
96 mammals. Although there are clear caveats to assaying properties of the microbiota in a non-native  
97 host, several prior studies have demonstrated that germ-free microbiota transplantations from other  
98 mammals can recapitulate many aspects of the microbial community (13–15) and even host  
99 physiology (16–19) in the murine host. Importantly, these microbiota transplant experiments provide  
100 an experimental tool to estimate relative differences in fitness between microbiotas because each  
101 microbiota is transplanted into one or more replicate murine hosts with the same carrying capacity. In  
102 germ-free Swiss Webster mice colonized with four of the lowest density microbiotas in our initial

103 screen (lion, elephant, ferret, and red panda), the lion and red panda microbiotas reached higher  
104 microbiota densities in the mouse than in the native host, suggesting their densities were limited by  
105 the carrying capacity of their host. The elephant and ferret microbiotas colonized mice at densities  
106 comparable to those in the native host and significantly less dense than a mouse microbiota (Figure  
107 1E), suggesting their densities are limited by the fitness of each microbiota that cannot reach the  
108 mouse carrying capacity. Altogether, these mammalian microbiota samples and germ-free transfer  
109 experiments demonstrate that as in macroecology, microbiota density represents the combined  
110 influence of host carrying capacity and community fitness.

### 111 **Manipulation of colonic microbiota density alters host physiology**

112 To broadly assess the impact of therapeutics on gut microbiota density, we provided SPF mice with  
113 one of 20 orally administered drugs, including antibiotics, anti-motility agents, and laxatives (Table  
114 S2). Only 9 of the 14 tested antibiotics significantly decreased gut microbiota density compared to  
115 untreated animals ( $p < 0.05$  for each; Kruskal-Wallis rank sum test, followed by a Dunn's test with  
116 Bonferroni correction). Amongst these 9 density-reducing antibiotics, there were substantial  
117 differences in each drug's depleting capacity (Figure 2A). Of the laxatives, PEG 3350 reduced  
118 microbiota density ( $p = 2.22 \times 10^{-4}$ ), while lactulose increased it ( $p = 0.0279$ ). The anti-motility agent  
119 loperamide and the proton pump inhibitor omeprazole had no significant effect. Across the  
120 pharmacologics, we never observe high microbiota density with low alpha diversity, which drives a  
121 significant correlation between alpha diversity and microbiota density ( $\rho = 0.628$ ,  $p < 0.0001$ ,  
122 Spearman correlation; Fig. S3H). However, we commonly observe high alpha diversity with low  
123 microbiota density (e.g. animals given metronidazole; Fig. S3H), suggesting changes in microbiota  
124 density do not strictly correspond to changes in alpha diversity (see supplemental results and Fig.  
125 S3). As with our results in the mammals, we found no correlation between microbiota density and  
126 fecal water content across the tested pharmacologics ( $\rho = -0.338$ ,  $p = 0.411$ , Spearman; Fig. S4).

127 Comparing antibiotic-treated or germ-free mice with conventional mice has demonstrated the  
128 influence of the microbiota on a range of physiological measures (15, 20–29). To better understand  
129 the impact of microbiota density on host physiology, we selected five antibiotics (ampicillin,  
130 ciprofloxacin, clindamycin, polymyxin B, vancomycin) based on their varying ability to decrease  
131 microbiota density (Figure 2A). As expected, treating 4-week old SPF C57BL/6J mice with each  
132 antibiotic in their drinking water for four weeks ( $n = 6$  mice per antibiotic, 9 SPF antibiotic-free controls,  
133 and 6 germ-free controls) led to a range of density reductions across the experimental groups (1.1 –  
134 36.0 fold; Figure S4A). We found a significant negative correlation between cecum size and  
135 microbiota density ( $\rho = -0.729$ ,  $p = 2.46 \times 10^{-7}$ , Spearman; Figures 2B and S4B). Epididymal fat pad  
136 mass, fecal IgA, and lamina propria FoxP3<sup>+</sup>CD4<sup>+</sup> regulatory T cells were each positively correlated  
137 with microbiota density ( $\rho_{\text{fat}} = 0.587$ ,  $p_{\text{fat}} = 6.11 \times 10^{-5}$ ;  $\rho_{\text{IgA}} = 0.783$ ,  $p_{\text{IgA}} = 3.35 \times 10^{-7}$ ;  $\rho_{\text{Treg}} = 0.639$ ,  
138  $p_{\text{Treg}} = 5.31 \times 10^{-6}$ ; Spearman; Figures 2C-2E and S4C-S4E). The strength of these associations is  
139 independent of the water content of the feces. Using group averages, the spearman correlations are

140 the same for dry and wet microbiota density vs phenotypes (i.e., the rank order of density does not  
141 change when using dry weights). Furthermore, when estimating the relationships between microbiota  
142 density and host physiology with linear models we find that wet weight is a better predictor of changes  
143 in cecum size, epididymal fat pad mass, fecal IgA, and FoxP3<sup>+</sup>CD4<sup>+</sup> regulatory T cells than dry  
144 weight.

### 145 **Microbiota density in inflammatory bowel disease (IBD)**

146 To characterize the impact of host health status on gut microbiota density, we collected fecal samples  
147 from 70 healthy controls, 144 subjects with Crohn's disease (CD), 109 subjects with ulcerative colitis  
148 (UC), and 19 subjects with UC that had undergone an ileal pouch-anal anastomosis (IPAA) procedure  
149 following total colectomy. Concordant with prior work using phylum-specific qPCR (30) and flow  
150 cytometry (CD-only; (10)), subjects with IBD had decreased microbiota density compared to healthy  
151 controls ( $p < 0.001$  for each vs Healthy, Kruskal-Wallis rank sum test, followed by a Dunn's test with  
152 Bonferroni correction; Figure 3A), even when excluding individuals receiving antibiotics (Figure S4A).  
153 Individuals with active CD or UC, as well as IPAA subjects had increased fecal water content  
154 compared to healthy individuals ( $p < 0.05$  for each vs Healthy; Tukey's HSD), while individuals with  
155 inactive CD or UC did not. Nonetheless, the decrease in microbiota density in IBD compared to  
156 healthy controls was consistent across individuals with active disease or inactive disease ( $p < 0.001$   
157 for each vs Healthy, Kruskal-Wallis rank sum test, followed by a Dunn's test with Bonferroni  
158 correction; Figure 3B), demonstrating the microbiota density changes in IBD were not simply driven by  
159 the increased fecal water content that occurred with active inflammation.

160 To associate changes in microbiota composition with the altered microbiota density in  
161 individuals with IBD, we performed 16S rRNA gene amplicon sequencing of the fecal DNA (Figure  
162 3C-3D). In line with previous studies (30–33), the IBD microbiome had a decreased alpha diversity  
163 compared to healthy subjects ( $p < 0.01$  for all; Kruskal-Wallis rank sum test, followed by a Dunn's test  
164 with Bonferroni correction; Figure S5). When we multiplied each taxa's relative abundance by the  
165 microbiota density to calculate their absolute abundances, we found decreases in gut microbiota  
166 density were most significantly correlated with decreases in Firmicutes, while Proteobacteria were the  
167 only one of the four major phyla in the gut microbiota that were not correlated with microbiota density  
168 (Figures 3E-3H). These results from measuring the absolute microbiota differ from common  
169 observations of relative increases in Proteobacteria associated with IBD (30, 31). More accurately, it  
170 appears that Proteobacteria are able to sustain a constant density in the in IBD as the other phyla  
171 decrease in absolute terms.

### 172 **Fecal microbiota transplants restore microbiota density and microbiota fitness**

173 Given the large difference in the microbiota between healthy individuals and those with recurrent  
174 *Clostridium difficile* infection (rCDI) (Figure S6; (34, 35)), we hypothesized that on a mechanistic level,  
175 FMT bolsters colonization resistance by improving gut microbiota fitness. In fecal samples from FMT  
176 donors and their rCDI FMT recipients prior to and after FMT, we observed that the rCDI gut microbiota

177 has a significantly lower microbiota density than the donor microbiota, and that FMT increased  
178 microbiota density ( $p < 0.05$  for all comparisons, Kruskal-Wallis rank sum test, followed by a Dunn's  
179 test with Bonferroni correction; Figure 4A). We did not observe any differences in fecal water content  
180 between the donors and recipients before or after FMT ( $p > 0.2$  for all comparisons, Tukey's HSD). In  
181 addition, we found that rCDI FMT recipients had both a relative and absolute increase in  
182 Proteobacteria that was significantly reduced by FMT (Figures 4B, 4C, and S6C-S6F). These data  
183 suggest that FMT restores higher densities of Bacteroidetes, Firmicutes, and Actinobacteria to more  
184 fully realize the host's carrying capacity. However, several factors may confound this conclusion as  
185 individuals with rCDI are often on antibiotics prior to FMT.

186 To separate the host physiologic and pharmacologic factors that might impact our  
187 understanding of community fitness in rCDI, we utilized a gnotobiotic murine model of FMT (Figure  
188 4D) where germ-free mice were initially colonized with the fecal material of individuals with rCDI for 3  
189 weeks prior to a single transplant of fecal material via oral gavage from a second human donor – the  
190 same healthy FMT donor used for the transplant clinically. As a control, we colonized germ-free mice  
191 with the FMT donor microbiota alone (Figure 4D). The microbiota density of mice colonized with the  
192 healthy samples (a) was greater than that of mice colonized with rCDI samples (b) ( $p < 0.001$ ,  
193 Kruskal-Wallis rank sum test, followed by a Dunn's test with Bonferroni correction; Figure 5E),  
194 suggesting that rCDI individuals have a reduced microbiota fitness compared to healthy donors.  
195 Following the introduction of the healthy donor microbiota to the mice colonized with the rCDI  
196 microbiota (c), we observed increased microbiota density in these mice ( $p < 0.001$ , Kruskal-  
197 Wallis rank sum test, followed by a Dunn's test with Bonferroni correction; Figure 4E), implying a  
198 restoration of microbiota fitness. Furthermore, when we colonize germ-free mice with the microbiota of  
199 the individuals with rCDI 6-12 months after they received an FMT (d), we find that their microbiota  
200 fitness had been restored, just as in our mouse FMT model ( $p < 0.001$ , Kruskal-Wallis rank sum test,  
201 followed by a Dunn's test with Bonferroni correction; Figure 4E). These findings in the mice model  
202 recapitulate the data in our human cohort of FMT recipients and suggest that FMT successfully treats  
203 the fitness defect of the rCDI community.

## 204 Discussion

205 The DNA-based microbiota density estimation method employed here and in previous studies (9, 11,  
206 12) has the advantage that it can be incorporated into existing 16S rRNA and metagenomic workflows  
207 by simply weighing the input sample and ensuring the input mass of fecal material is within the linear  
208 range of the DNA extraction protocol. Incorporating microbiota density into standard culture  
209 independent microbiome workflows would greatly broaden our understanding of factors that drive one  
210 of the most fundamental properties of any ecosystem – its population density – and it would allow the  
211 broader study of absolute taxon abundances. Recent work has demonstrated that the amount of  
212 live/dead bacteria can vary between fecal samples (36–38), which would not be captured by a DNA-

213 based density metric. However, in practice we found that the influence of any variation from live/dead  
214 bacteria was sufficiently low that it did not influence the major conclusions of this study; we observed  
215 a very significant correlation between the viability-based CFU density measurement and the DNA-  
216 based one and all of the major relationships observed in this study were consistent across both  
217 approaches (i.e., variation across mammals, IBD and IPAA lower density than healthy, rCDI lower  
218 density than FMT donor or rCDI post-transplant; Figure S1D).

219 Previous work has demonstrated that changes in fecal water are associated but not  
220 necessarily causally influencing differences in microbiota composition across the human population  
221 (39, 40). While both fecal water content and microbiota density vary across mammals and can be  
222 altered by pharmacologics (Fig. 2, S4F), dietary components (Fig. S7; (12)), and host disease status,  
223 we find microbiota density is consistently not correlated with water content. In the context of altering  
224 host physiology through antibiotic manipulation of microbiota density, the best predictor of the impact  
225 of changes of microbiota density on host physiology was when density was calculated with stool wet  
226 weight, suggesting both wet and dry components of stool are important diluents in determining  
227 microbiota density and its impact on the host.

228 Differences in microbiota density can be influenced by both the host's carrying capacity and  
229 the fitness of the microbiota to reach the carrying capacity of a given host. We found the density of gut  
230 microbes varies across mammals and is more similar in more phylogenetically related species. Across  
231 mammals, gut architecture appears to be a major driver of density, as the lowest densities were  
232 observed in order *Carnivora*, whose short, simple intestines have a lower carrying capacity and are  
233 maladapted for microbial fermentation at high densities. The low microbiota density of the red panda,  
234 a member of *Carnivora* with a herbivorous diet, further supports intestinal architecture as a major  
235 determinant of host carrying capacity and thus a driver of microbiota density. Finally, the significantly  
236 reduced microbiota density in humans with IPAA uniquely demonstrates that changing gut  
237 architecture within a species (in this case by surgery to treat ulcerative colitis) is equally capable of  
238 influencing host carrying capacity.

239 Within a murine host with controlled carrying capacity (i.e., fixed diet, genetics, housing, etc.),  
240 we found microbiota density can be altered with pharmacologics, with downstream consequences to  
241 host adiposity and immune function. Different antibiotics were highly varied in their ability to impact  
242 microbiota density, which could explain the mixed efficacy of antibiotics in microbiota-targeted clinical  
243 trials for complex disease and varied responses to antibiotics in animal models. Identifying more  
244 effective microbiota depleting cocktails would improve the design of such studies, while measuring  
245 microbiota density in trials with antibiotics could better stratify clinical response. Previous studies have  
246 observed that microbiota density can be manipulated by dietary changes (12, 41). Furthermore, we  
247 found that altering microbiota density with either diet or antibiotics could modify colitis severity (12).  
248 Understanding the long-term effect of high or low microbiota density on health could help refine the  
249 use of diet and the microbiota in disease treatment and prevention.

250 Finally, we observed that microbiota density is reduced in both IBD and rCDI. Microbiota  
251 density reductions, from a lack of fitness in the microbial community, were “druggable” by FMT. The  
252 ability of FMT to increase microbiota density through improved community fitness provides  
253 mechanistic insights into FMT for rCDI and a novel biomarker to track its success. This result also  
254 highlights that routine monitoring to identify individuals with microbiota fitness deficiencies combined  
255 with prophylactic microbial therapeutics targeted might form a therapeutic strategy to boost  
256 colonization resistance to treat or prevent disease.

## 257 **Acknowledgements**

258 We are grateful to C. Fermin, E. Vazquez, and G. Escano in the Mount Sinai Immunology Institute  
259 Gnotobiotic facility for their help with gnotobiotic animal husbandry. D. Present and S. Petrunio  
260 provided helpful suggestions during the course of this work. Next generation sequencing was  
261 performed at NYU School of Medicine by the Genome Technology Center partially supported by the  
262 Cancer Center Support Grant, P30CA016087. Human microbiome processing was performed in part  
263 by the Human Immune Monitoring Center at the Icahn School of Medicine at Mount Sinai. This work  
264 was supported in part by the staff and resources of Scientific Computing and of the Flow Cytometry  
265 Core at the Icahn School of Medicine at Mount Sinai. Funding: This work was supported by grants  
266 from the Leona M. and Harry B. Helmsley Charitable Trust (I.D.), the NIH (NIGMS GM108505 for  
267 J.J.F. and NIDDK DK112679 for E.J.C.), Janssen Research & Development LLC, and SUCCESS.  
268 Raw sequencing files (fastq) for all 16S sequencing samples (antibiotic-treated mice, IBD cohort, and  
269 rCDI FMT cohort) are stored in the public Sequence Read Archive (SRA) under project number  
270 PRJNA413199. Flow cytometry data has been uploaded to Mendeley Data  
271 (<http://dx.doi.org/10.17632/cjvfrbyxhj.1>).

272

## 273 **Declaration of Interests**

274 B.C., R.H., M.D., and J.J.F. are consultants for Janssen.



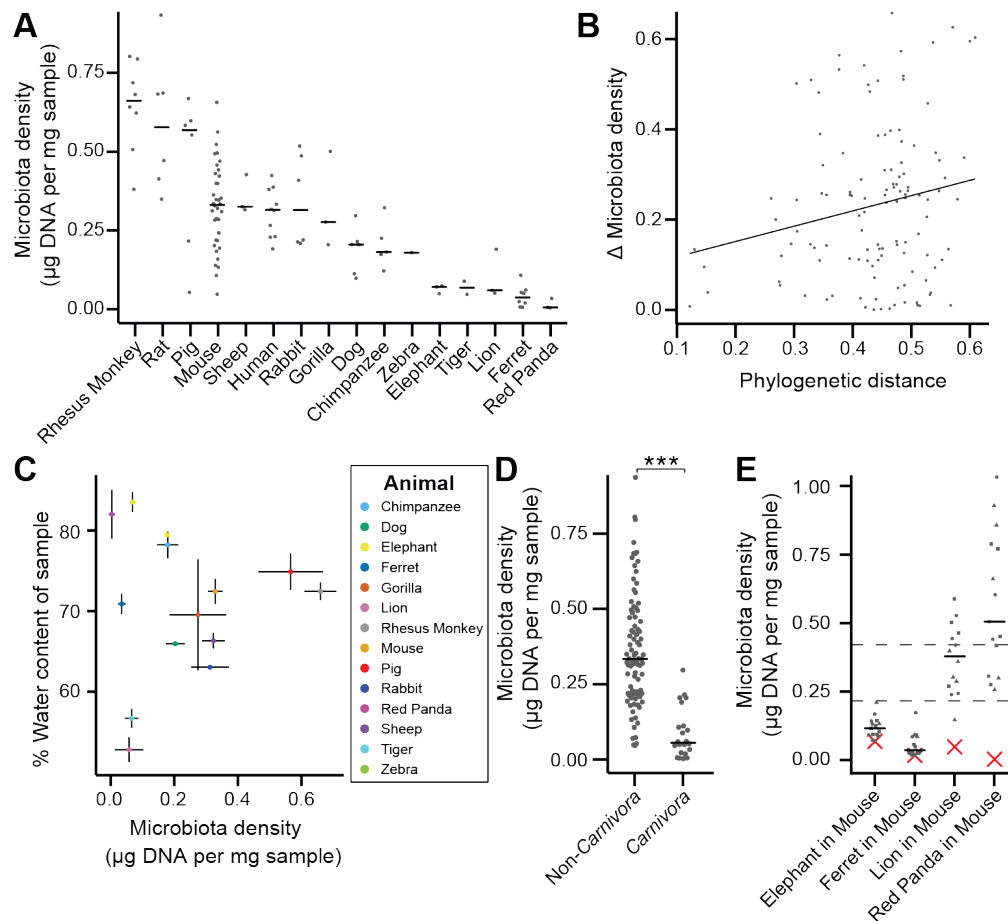

275

276 **Figure 1. The natural variation in gut microbiota density across mammals is driven by host and**  
 277 **microbial factors.**

278 (A) Fecal microbiota density varies across mammals.

279 (B) Differences in microbiota density between animals was correlated with the degree of host  
 280 phylogenetic relatedness as measured by mitochondrial 16S DNA sequence similarity.

281 (C) Microbiota density and water content of fecal samples are not correlated.

282 (D) Animals from the order *Carnivora* have a reduced microbiota density compared to mammals from  
 283 other orders.

284 (E) Different mammalian gut microbiotas transplanted into germ-free Swiss Webster mice (n = 3 per  
 285 group) vary in their fitness to reach microbiota densities similar to mouse microbiotas.

286 In A and D-E, points depict individual samples, and bars indicate median. In C points and lines  
 287 indicate median values  $\pm$  SEM. In E a red X indicates the microbiota density of the original  
 288 mammalian sample, while dashed lines represent IQR of conventional Swiss Webster mice. \*\*\*p <  
 289 0.001.

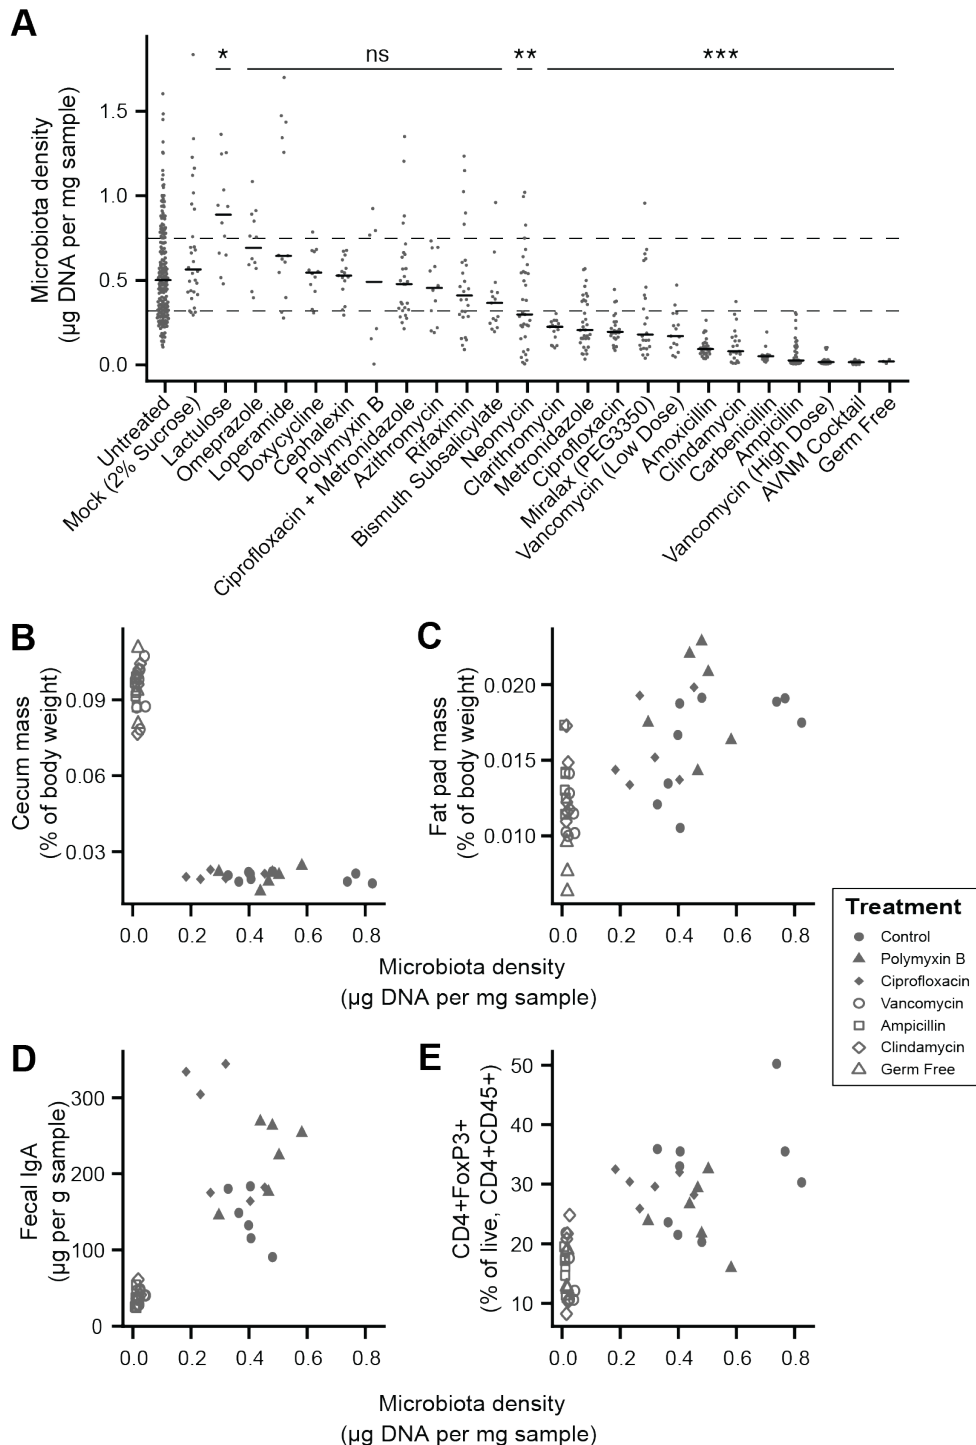

290

291 **Figure 2. Manipulation of colonic microbiota density alters host physiology.**

292 (A) Pharmacologic interventions differentially alter microbiota density in SPF C57BL/6J mice.  
 293 Samples from 3-12 (mean = 6) mice per group.

294 (B-E) Antibiotic-induced changes in microbiota density significantly correlate with (B) host cecum size,  
 295 (C) adiposity, (D) fecal IgA, and (E) colonic lamina propria FoxP3+ T regulatory cells. n = 6 mice per  
 296 antibiotic group, 9 SPF antibiotic-free controls, and 6 germ-free controls.

297 In A, dashed lines represent the IQR of untreated SPF C57BL/6J mice and AVNM = ampicillin,  
 298 vancomycin, neomycin, metronidazole. Statistical tests performed for individual treatment conditions

299 vs untreated using Kruskal-Wallis with Dunn's post-test corrected for multiple comparisons with the  
300 Bonferonni correction. Bars indicate median. ns = not significant, \*p < 0.05, \*\*p < 0.01, and \*\*\*p <  
301 0.001.  
302 In **B-E** points represent individual mice. Shapes indicate treatment group.

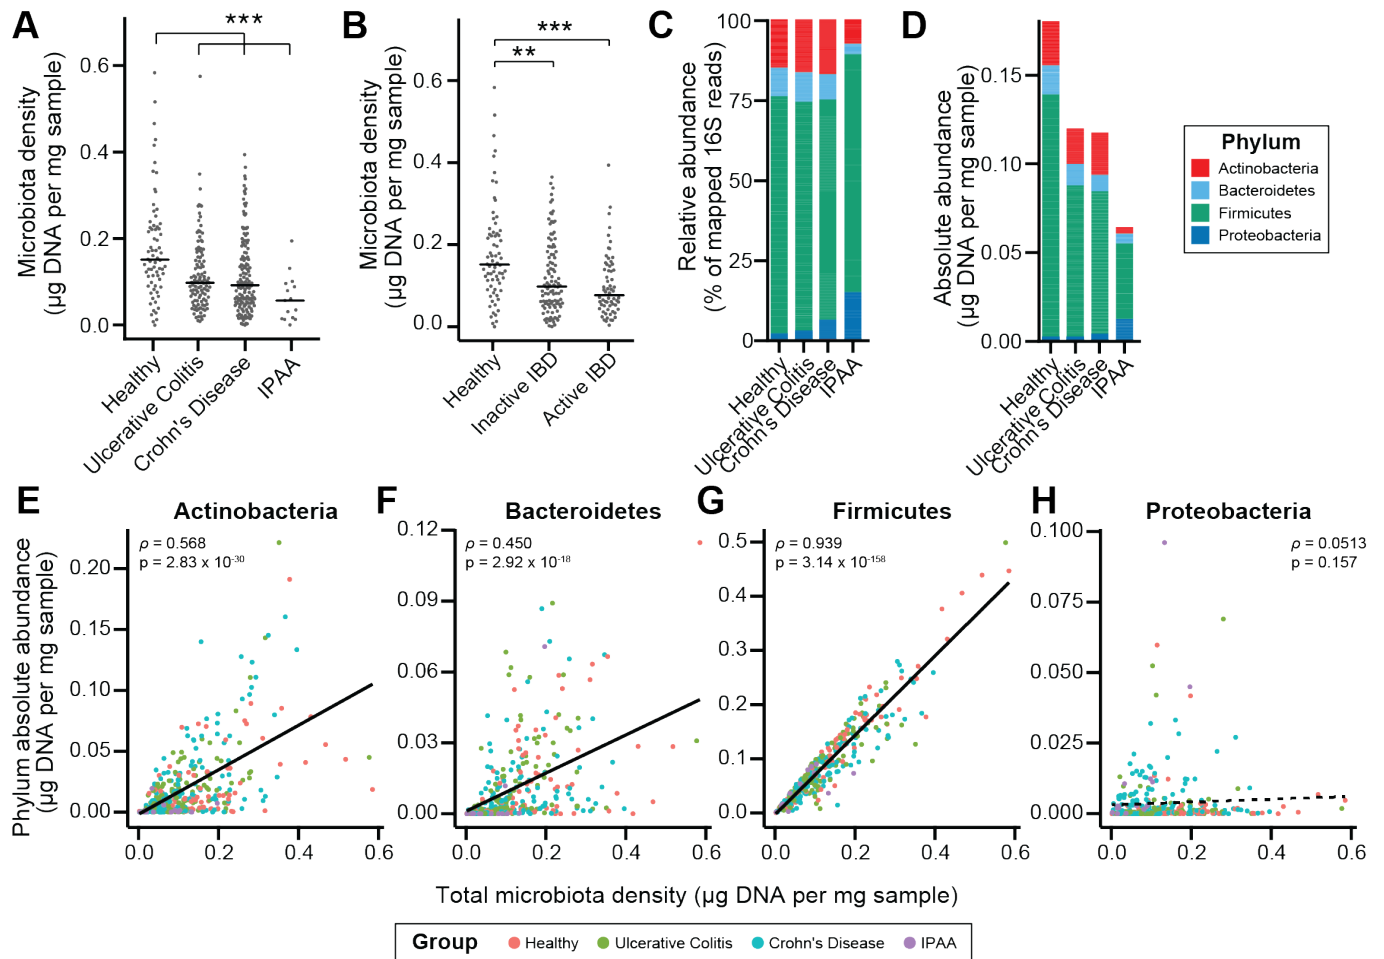

303

304 **Figure 3. Microbiota density is altered in IBD.**

305 (A) Subjects with ulcerative colitis and Crohn's disease, as well as subjects who have undergone ileal  
 306 pouch-anal anastomosis (IPAA) have reduced microbiota density compared to healthy controls.

307 (B) The reduction in microbiota density in IBD patients is independent of disease activity.

308 (C-D) 16S rRNA gene sequencing reveals phylum-level changes in (C) relative and (D) absolute  
 309 abundances of the microbiota in subjects with UC, CD, and IPAA compared to healthy controls.

310 (E-H) The absolute abundance of all of the major phyla are strongly correlated with microbiota  
 311 density, with the exception of Proteobacteria, whose abundance is largely constant.

312 In A-C, bars indicate median, \*\* p < 0.01, and \*\*\* p < 0.001 (Kruskal-Wallis with Dunn's post-test  
 313 corrected for multiple comparisons with the Bonferonni correction). In C, each point represents the  
 314 average microbiota density for an individual mouse before or after the initiation and development of  
 315 colitis. In E-H, points represent individual subjects and colors indicate their health status.

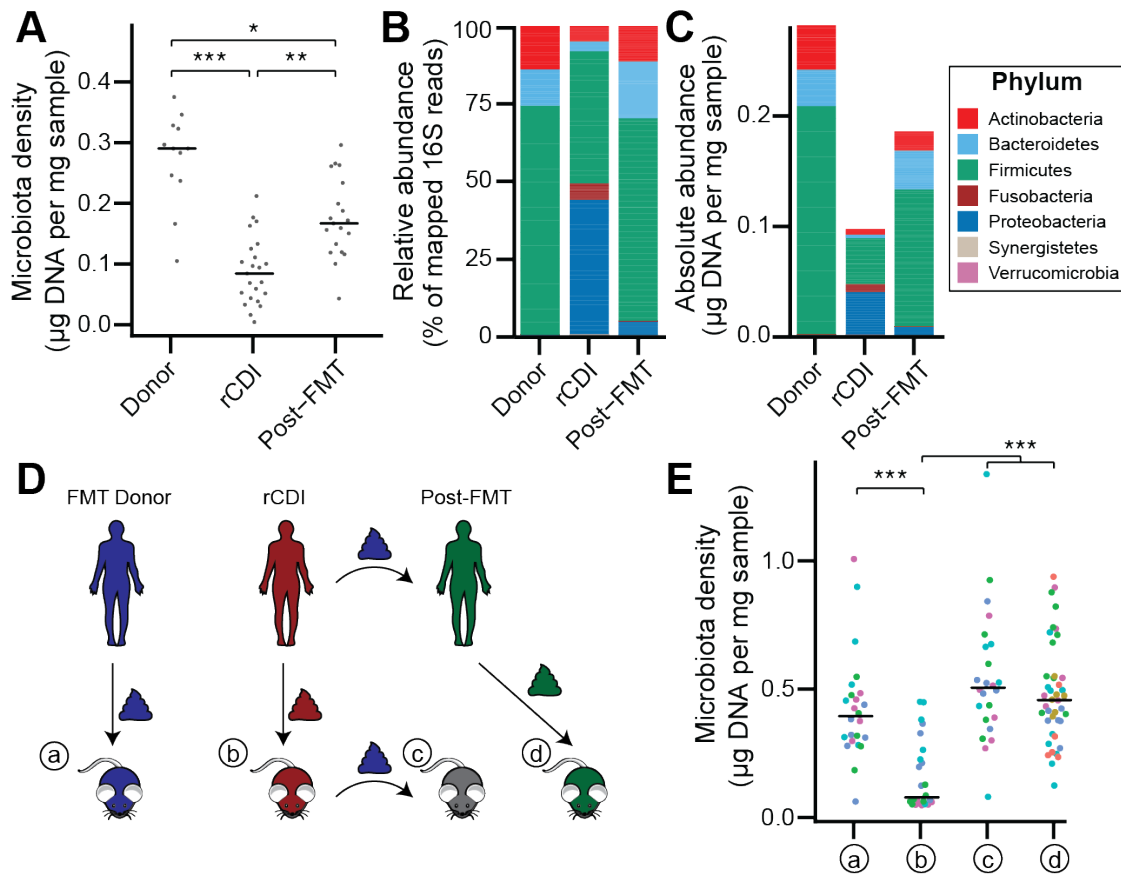

316

317 **Figure 4. The rCDI microbiota has a fitness defect that is therapeutically treatable by FMT.**

318 (A) rCDI subjects have reduced microbiota densities that are significantly increased upon FMT with  
319 donor microbiotas.

320 (B and C) Following FMT, the composition of the microbiota of individuals with rCDI is restored to  
321 more closely resemble that of healthy donors in both (B) relative and (C) absolute terms.

322 (D) Germ-free mice were colonized with the microbiota from FMT Donors (a), or individuals with rCDI  
323 that underwent FMT (b). These mice then received the microbiota from the FMT donor corresponding  
324 to the clinical FMT (c), which could be compared to germ-free mice colonized with the Post-FMT  
325 sample from the individual who received the FMT (d).

326 (E) Microbiota density in mice from the experimental scheme described in (D) showed decrease in  
327 microbiota fitness prior to FMT and an increase in microbiota density following FMT demonstrating the  
328 restoration of community fitness.

329 In A and E points represent individual samples, bars indicate median, \*p < 0.05, \*\*p < 0.01, and \*\*\*p <  
330 0.001 (Kruskal-Wallis with Dunn's post-test corrected for multiple comparisons with the Bonferonni  
331 correction). In E, colors represent each one of five different FMT donor-recipient pairs.

## 332 **Supplemental Methods**

333

### 334 **Mammalian samples**

335 Fecal samples from the mammals used in this study were collected either from laboratory animals  
336 housed and maintained at the Icahn School of Medicine at Mount Sinai (New York, NY), or from  
337 animals at the Zoo Knoxville (Knoxville, TN). Approximate animal masses were curated from the  
338 literature (42–47).

339

### 340 **Mice**

341 Specific pathogen free (SPF) mice were purchased from Jackson Labs (C57BL/6J mice) or Taconic  
342 (Swiss Webster mice). Germ-free (GF) WT and Rag1<sup>-/-</sup> C57BL/6J, and Swiss Webster mice were  
343 housed in standard, commercially available flexible film isolators. To generate gnotobiotic mice from  
344 human or mammalian fecal samples, GF mice were gavaged with 200  $\mu$ L of clarified stool from the  
345 source. Four week old male mice were used for the antibiotic treatment phenotyping experiments  
346 (Figure 3). All other experiments used both male and female mice between 4 and 6 weeks old. Swiss  
347 Webster mice were used to perform gnotobiotic experiments. Experiments and animal care were  
348 performed in accordance with the policies of the Icahn School of Medicine Institutional Animal Care  
349 and Use Committee (IACUC).

350

### 351 **Human subjects**

352 To study the microbiota of individuals with IBD, we collected fecal samples from 70 healthy controls  
353 (42 female, 28 male), with an average age of 55.1 (range: 23-73), 109 individuals with ulcerative  
354 colitis (67 female, 42 male), with an average age of 52.8 (range: 22-80), and 144 individuals with  
355 Crohn's Disease (72 female, 72 male), with an average age of 41.7 (range: 22-79). The study was  
356 approved by the Institutional Review Board (IRB) at Mount Sinai. For subjects with ulcerative colitis  
357 we defined disease activity using the Mayo Endoscopic Subscore (Mayo). Individuals with a Mayo = 3  
358 were categorized as having active disease, and individuals with a Mayo = 0 were categorized as  
359 having inactive disease. For individuals with Crohn's disease, active disease was defined as a Simple  
360 Endoscopic Score for Crohn Disease (SES-CD)  $\geq$  5, and inactive disease as SES-CD = 0. The  
361 remaining samples were excluded from these analyses. Stool samples were also collected from  
362 individuals with ulcerative colitis that had undergone an ileal pouch-anal anastomosis procedure  
363 following total colectomy (3 female, 12 male), with an average age of 42.93 (range: 19-68). These  
364 samples were collected from individuals in accordance with the IRB at the Tel Aviv Sourasky Medical  
365 Center. All individuals signed an informed consent. For the analysis of the change in the microbiota in  
366 recurrent *Clostridium difficile* infection following fecal microbiota transplantation, we collected samples  
367 from 11 healthy donors (8 female, 3 male; average age: 47.9, range: 25-75), 12 recipients who also  
368 had IBD (8 female, 4 male; average age: 55.3, range: 32-78), and 11 recipients who did not have IBD

369 (9 female, 3 male; average age: 62, range: 36-87), as described in (48). The study was approved by  
370 the Mount Sinai IRB.

371

### 372 **Fecal sample collection and pre-processing**

373 To quantify the mass of each fecal sample or fecal sample aliquot, we pre-weighed tubes prior to  
374 sample collection and post-weighed the tubes after adding the fecal material. For mouse samples,  
375 fresh fecal samples were collected directly into the collection tubes and stored at -80°C. For all other  
376 mammalian species with larger fecal sample sizes, samples were aliquoted on dry ice or liquid  
377 nitrogen and stored at -80°C. Sample aliquot sizes were targeted in the linear range of the fecal DNA  
378 extraction protocol (approx. 50 mg in mice and <200 mg in humans) to enable quantitative yields of  
379 DNA from the fecal material.

380

### 381 **Phenol:chloroform DNA extraction**

382 Fecal samples processed with the phenol:chloroform DNA extraction method were collected into 2.0  
383 mL collection tubes (Axygen, SCT-200-SS-C-S). Similar to previous studies (9), samples were  
384 suspended in a solution containing 282  $\mu$ L of extraction buffer (20 mM Tris (pH 8.0), 200 mM NaCl,  
385 2mM EDTA), 200  $\mu$ L 20% SDS, 550  $\mu$ L phenol:chloroform:isoamyl alcohol (25:24:1, pH 7.9), and 400  
386  $\mu$ L of 0.1 mm diameter zirconia/silica beads (BioSpec, 11079101z). Samples were then lysed by  
387 mechanical disruption with a Mini-Beadbeater-96 (BioSpec, 1001) for 5 minutes at room temperature.  
388 Samples were centrifuged at 4000rpm for 5 minutes to separate aqueous and organic phases. The  
389 aqueous phase was collected and mixed with 650  $\mu$ L of PM Buffer (Qiagen, 19083). DNA extracts  
390 were then purified using a Qiagen PCR Purification kit (Qiagen, 28181), and eluted into 100  $\mu$ L of EB  
391 buffer. Purified DNA was quantified using the Broad Range or High Sensitivity Quant-IT dsDNA Assay  
392 kit (Thermo Fisher, Q32853 and Q33130) in combination with a BioTek Synergy HTX Multi-Mode  
393 Reader.

394

### 395 **DNase Inactivation Buffer DNA extraction**

396 Phenol:chloroform based DNA extraction with bead beating is an effective method to isolate microbial  
397 DNA from feces. However, automation of phenol:chloroform requires liquid handling robotics in an  
398 environment compatible with this hazardous chemical mixture. In addition, the variable volume of the  
399 aqueous phase produced with this method presents an obstacle for its automation. We therefore  
400 tested the DIB bead beating extraction protocol as an alternative, since by eliminating the hazardous  
401 chemicals the protocol is compatible with more high-throughput liquid handling robotics platforms.

402 Samples processed with the DNase Inactivation Buffer (DIB) DNA extraction method were collected  
403 into 1.0 mL tubes (Thermo Fisher, 3740). Samples were suspended in a solution containing 700  $\mu$ L of  
404 DIB (0.5% SDS, 0.5 mM EDTA, 20 mM Tris (pH 8.0)) and 200  $\mu$ L of 0.1 mm diameter zirconia/silica  
405 beads. Samples were then lysed by mechanical disruption and centrifuged as above. Since there is  
406 no phase separation with this method, it is straightforward to subsample the supernatant to improve

407 the dynamic range of DNA quantification by avoiding saturating the column with DNA quantities above  
408 the binding capacity. 50-200  $\mu\text{L}$  of the supernatant was transferred into new collection tubes.  
409 Depending on the volume collected, an additional volume of DIB was added in order to reach a total  
410 volume of 200  $\mu\text{L}$ . Next, this DIB lysate was combined with 600  $\mu\text{L}$  of PM Buffer, purified with a  
411 Qiagen PCR Purification kit, and eluted into 100  $\mu\text{L}$  of EB buffer. Purified DNA was quantified using  
412 the Broad Range or High Sensitivity Quant-IT dsDNA Assay kit in combination with a BioTek Synergy  
413 HTX Multi-Mode Reader.

414

#### 415 **16S rRNA sequencing**

416 DNA templates were normalized to 2  $\text{ng}/\mu\text{L}$ , and the V4 variable region of the 16S rRNA gene was  
417 amplified by PCR using indexed primers as previously described (49). The uniquely indexed 16S  
418 rRNA V4 amplicons were pooled and purified with AmpureXP beads (Beckman Coulter) with a ratio of  
419 1:1 beads to PCR reaction. Correct amplicon size and the absence of primer dimers were verified by  
420 gel electrophoresis. The pooled samples were sequenced with an Illumina MiSeq (paired-end 250bp).

421

#### 422 **Fecal sample water content**

423 Samples were collected into pre-weighed 2.0 mL collection tubes (Axygen, SCT-200-SS-C-S). After  
424 collecting a fecal sample, sample mass was determined by post-weighing the tube. To measure the  
425 water content of a sample, tubes were placed at 105°C for 24 hours, and weighed again (50). The  
426 water content of a sample was calculated as the difference in final and initial mass of the sample,  
427 divided by the initial mass.

428

#### 429 **Pharmacologic treatment of mice**

430 Antibiotics (and other compounds) were provided *ad libitum* to mice in their drinking water, when  
431 possible. All of the pharmacologics were prepared into a 2% sucrose solution (which also served as  
432 the control treatment) and sterilized with a 0.22  $\mu\text{m}$  filter. Compounds that were not readily water-  
433 soluble were administered to mice via oral gavage of 200  $\mu\text{L}$  once per day, as indicated in Table S2.  
434 Unless identified otherwise, antibiotic and pharmacologic concentrations were calculated using a  
435 maximal clinical dose (taken from the online clinical resource UpToDate.com) or from previous studies  
436 (20, 51–54), assuming a 20 g mouse that drinks 3 mL water per day.

437

#### 438 **Measurement of fecal immunoglobulin A**

439 Fecal pellets were collected and massed. To each fecal pellet, 1 mL of sterile PBS was added per 100  
440 mg feces. Each sample was homogenized without beads in a Mini-Beadbeater-96 for 3 min (BioSpec,  
441 1001) followed by vortexing for 3 min. Samples were centrifuged at 9000g for 10 min at 4°C and  
442 supernatants were collected. Immunoglobulin A was measured by ELISA. Plates were coated with a  
443 working concentration of 1  $\text{ng}/\mu\text{L}$  of goat anti-mouse IgA-UNLB (SouthernBiotech Cat# 1040-01,  
444 RRID:AB\_2314669), and then blocked with 1% BSA in PBS overnight at 4°C. Wells were washed with



445 washing buffer (0.1% Tween-20 in PBS) 3 times. Then, fecal supernatant was diluted in dilution  
446 buffer (0.1% Tween-20, 1% BSA in PBS), added to each well, and incubated overnight at 4°C. The  
447 wells were washed again with washing buffer 5 times, and incubated for 2 hours at room temperature  
448 with a 1/2000 dilution of goat anti-mouse IgA-HRP (Sigma-Aldrich Cat# A4789, RRID:AB\_258201) in  
449 dilution buffer. Following the incubation, the wells were washed 5 times with PBS/Tween-20. Next,  
450 TMB substrate was added to wells for 1 minute (KBL, 50-76-02 and 50-65-02), and the reaction was  
451 quenched using 1M H<sub>2</sub>SO<sub>4</sub>. Absorbance at 450 nm was measured using a BioTek Synergy HTX Multi-  
452 Mode Reader. Samples were quantified against a standard curve from 1000 ng/mL to 0.5 ng/mL.

453

#### 454 **CFU Assay**

455 We performed colony forming unit assays to obtain a culture-dependent measurement of microbiota  
456 density that also incorporates viability, as only live microbes will form colonies in this assay. Fecal  
457 samples were stored at -80°C after sampling. Prior to plating larger samples were pulverized under  
458 liquid nitrogen. Approximately 500mg of fecal sample was homogenized in 12 ml of rich broth and  
459 filtered with a 100 µm filter to remove particulate matter (16). Serial dilutions of this clarified fecal  
460 slurry were plated on chocolate agar and grown in an anaerobic chamber at 37°C for 72hr,  
461 whereupon colonies were manually quantified and normalized to CFU/g feces.

462

#### 463 **Colonic lamina propria immune populations**

464 Colonic lamina propria immune cell populations were measured as previously described (16). Briefly,  
465 colonic tissue was dissected and placed into RPMI medium at 4°C. Tissues were then transferred into  
466 HBSS and vortexed briefly, before being transferred into dissociation buffer (10% FBS, 5 mM EDTA,  
467 15 mM HEPES in HBSS) and shaken for 30 minutes at 110 rpm at 37°C. Tissues were washed in  
468 HBSS before digestion in HBSS containing 2% FBS, 0.5 mg/mL Collagenase VIII (Sigma C2139) and  
469 0.5 mg/mL DNase 1 (Sigma DN25) for 30 minutes at 110 rpm at 37°C. Digested tissue was then  
470 passed through a 100 µm filter into cold RPMI medium. Samples were then centrifuged at 1500 rpm,  
471 4°C for 5 minutes. The supernatant was removed and cells were washed once more in PBS before  
472 staining for flow cytometry. No enrichment of mononuclear cells by density centrifugation was  
473 performed. Cells were initially blocked with Fc Block (BioLegend Cat# 101320, RRID:AB\_1574975)  
474 and subsequently stained for: viability (BioLegend Cat# 423101) and immunolabelled for expression  
475 of CD4 (1:200, BioLegend Cat# 100411, RRID:AB\_312696) and CD45 (1:100, BioLegend Cat#  
476 103115, RRID:AB\_312980), and FoxP3 (1:100, Thermo Fisher Scientific Cat# 12-5773-82,  
477 RRID:AB\_465936). Surface markers were stained before fixation and intracellular markers were  
478 stained after fixation with the FoxP3 Fixation/Permeabilization Kit (eBioscience). Samples were run on  
479 a BD LSRII and analyzed with FlowJo.

480

481 **Microbiota density and absolute abundances**

482 We define microbiota density as the total DNA extracted from each sample (in  $\mu\text{g}$ ) per mg of fresh  
483 sample. For samples processed with the DIB-based extraction method, the total DNA extracted is  
484 adjusted by the fraction of the supernatant that was subsampled in the DNA extraction (e.g. a 100  $\mu\text{L}$   
485 subsample is 1/7th of the total volume; total sample DNA is [DNA eluted] \* 7). We then are able to  
486 utilize this measurement of microbiota density to compute the absolute abundance of microbial taxa  
487 by scaling the relative abundances of microbes in a sample by the microbiota density of that sample.

488

489 **Phylogenetic relatedness of mammalian samples**

490 Phylogenetic relatedness was measured using sequence distance of the mitochondrial DNA  
491 sequences. All sequences were downloaded from the RefSeq organelle genome resource database  
492 (<https://www.ncbi.nlm.nih.gov/genome/organelle/>). Accession numbers for specific sequences used  
493 can be found in Table S1. Sequence alignment and distance measurement was performed using  
494 Clustal Omega (55).

495

496 **16S rRNA data analysis**

497 Paired end reads were joined into a single DNA sequencing using the FLASH algorithm (56). We split  
498 our pooled sequencing library by index using QIIME v 1.9.1 (1), and picked OTUs against the  
499 greengenes reference database 13\_8 at 97% sequence identity (57, 58). The resulting OTU tables  
500 were subsequently analyzed in R (59) with the help of the *phyloseq* package (60), and custom  
501 functions developed to convert relative abundances into absolute abundances using microbiota  
502 density data.

503

504 **Statistical Analysis**

505 Data presented were analyzed and visualized using the R statistical software (59). Statistical tests  
506 were used as described in the main text. For nonparametric statistical tests, multiple comparisons  
507 were performed using Dunn's test following Kruskal-Wallis using the *FSA* R package (61), and  
508 corrected for multiple comparisons using Bonferonni correction. For many-to-one comparisons  
509 (e.g. pharmacologic treatments compared to untreated controls), multiple hypothesis testing  
510 correction was accomplished by using Dunnett's test, implemented with the *multcomp* R package  
511 (62). For multiple comparisons between experimental groups, Tukey's honest significant difference  
512 (HSD) was used to correct for multiple testing. Unless otherwise noted, figures depict individual  
513 samples as points, and the bars indicate the median or mean  $\pm$  SEM. In figures, \*p < 0.05, \*\* p <  
514 0.01, and \*\*\*p < 0.001.

515

516 **Repeated sampling of gnotobiotic mice**

517 For the experiments in which gnotobiotic mice were used to assess the roles of host carrying capacity  
518 and microbiota fitness in shaping microbiota density, mice were sampled longitudinally to increase  
519 sample size for each condition. For the mice colonized with fecal samples from the lion, elephant,

520 ferret, and red panda, two-way ANOVA shows that the main effect is the microbiota used to colonize  
521 the mouse ( $F = 32.3$ ,  $p = 8.27 \times 10^{-16}$ ), while the identity of the individual mice does not contribute to  
522 the effects ( $F = 1.08$ ,  $p = 0.388$ ). The same is true for the mice colonized with fecal samples from  
523 individuals with IBD and pouch ( $F = 29.4$ ,  $p < 0.0001$  for the colonizing microbiota;  $F = 0.746$ ,  $p =$   
524  $0.634$ ; two-way ANOVA). As a result, we are able to effectively measure the microbiota density of  
525 gnotobiotic mice in these conditions and increase the utility of each gnotobiotic mouse.

## 526 **Supplemental Results**

### 527 **DNase Inactivation Buffer vs Phenol Chloroform DNA extraction comparison**

528 To test if the two DNA extraction methods affected the resulting microbiota composition data, we  
529 processed separate aliquots from the same fecal sample using both methods. We found that the  
530 abundances of taxa in the sample processed with both methods were highly correlated (Figures S1A  
531 and S1B), suggesting that they represent equivalent ways to assay microbial community composition.  
532 In practice, the DIB method was most conducive to the small feces produced by mice and the large  
533 majority of mouse samples for this study were processed using this protocol, since the protocol  
534 utilizes smaller tubes that can be arrayed into standard 96-well formats. For the remaining mammals,  
535 the phenol:chloroform method was used as the number of stools used in the study was less, and the  
536 larger stools were more practical to aliquot into the wider 2.0 ml tube used for the phenol:chloroform  
537 method.

538 One possible limitation of using DNA content as a measurement of microbiota density is that  
539 small amounts of fecal matter contain sufficient DNA to saturate or clog the DNA binding columns  
540 used during extraction. This upper limit can largely be avoided by limiting the amount of input fecal  
541 material of higher microbiota density mammals (e.g. mice) to <50 mg and lower microbiota density  
542 mammals (e.g. humans) to <200 mg. In our experience, bead beating also becomes inefficient at  
543 >200 mg of fecal material. In contrast to the phenol:chloroform method, the DIB extraction protocol  
544 relies on a subsampling step that provides an additional safeguard to ensure the DNA extraction does  
545 not saturate the capacity of the Qiagen DNA-binding columns. By sampling a fraction of the lysate, we  
546 can extend the upper limit of our extraction protocol. At the extreme, using a 5  $\mu$ L subsample of the  
547 lysate can increase the dynamic range by a factor of 140, which in turn implies that we can measure  
548 microbiota density for samples containing up to 1.4 mg of DNA (140 x 10  $\mu$ g binding capacity of  
549 columns). On the lower end of our dynamic range, dye-based methods (Qubit Hi-sensitivity) provide  
550 an accurate detection down to 0.2 ng.

551

### 552 **qPCR quantification of DNA origin**

553 While the dynamic range of the DIB extraction method described above is typically sufficient for stool  
554 samples, which contain high densities of microbial DNA compared with other environments, we further  
555 extended the method with qPCR-based quantification of the V4 region of the 16S rRNA gene.  
556 Additionally, by utilizing DNA yield per fecal sample as a measure of microbiota density, we assume  
557 host DNA is a minor contributor to the total fecal DNA yield.

558 To quantify the amount of bacterial and mouse DNA in our samples, we targeted the V4 region  
559 of the bacterial 16S rRNA gene (63) and the mouse TNF $\alpha$  gene (64). qPCR reactions were performed  
560 in 20  $\mu$ L reaction volumes with final primer concentrations of 200 nM, using KAPA SYBR FAST  
561 Master Mix (2x) ROX Low (Kapa Biosystems). The thermal cycling and imaging were performed on  
562 the ViiA 7 Real-Time PCR System (Thermo Fisher).

563 We quantified the amount of host vs bacterial DNA in several samples by qPCR, and  
564 evaluated the qPCR performance against spike-in controls with known combinations of mouse and  
565 bacterial DNA. We found that even amongst samples with low microbial density (e.g. samples from  
566 mice treated with vancomycin), the DNA content is largely microbial (Figure S1C). We were also able  
567 to measure the presence of microbial DNA down to concentrations near 1 pg/ $\mu$ L (Figure S1C). This  
568 allows us to measure microbial density for samples with DNA as low as 100 pg (minimum  
569 concentration 1 pg/ $\mu$ L in a 100  $\mu$ L elution volume). Coupled with the ability to subsample the lysate  
570 from our DNA extraction protocol, this allows us to measure microbiota density across 5 orders of  
571 magnitude for the phenol:chloroform method and 7 orders of magnitude with the DIB protocol.

572  
573 **Absolute microbial dynamics and alpha diversity in response to pharmacologics**

574 Culture-independent measurements have revealed that antibiotics can disrupt the composition of a  
575 healthy gut microbiota (65). We hypothesized that antibiotics may also have an impact on the gut  
576 microbiota density. To test this hypothesis, we administered vancomycin in two doses (0.2 mg/mL and  
577 0.5 mg/mL) to two sets of SPF C57BL/6J mice and collected fecal pellets before and during treatment.  
578 We found that vancomycin exerted selective pressure against susceptible organisms leading to a  
579 relative expansion of Verrucomicrobia and Firmicutes in the low and high dose groups respectively  
580 (Figures S3A and S3B). When we multiplied each taxa's relative abundance by the microbiota density  
581 to calculate their absolute abundances, we observed a bloom of Verrucomicrobia in the low dose  
582 group (Figure S3C). Surprisingly, in the high dose group, we found that vancomycin successfully  
583 depleted members of all phyla, including Firmicutes (Figure S3D). Microbiota density and alpha  
584 diversity were not significantly correlated ( $\rho = 0.107$ ;  $p = 0.557$ ; Spearman; Figure S3E), as both low  
585 dose and high dose vancomycin significantly reduced alpha diversity ( $p_{\text{low}} = 6.10 \times 10^{-5}$  and  $p_{\text{high}} =$   
586  $0.00223$ , final timepoint vs baseline, Mann Whitney; Figure S3F), while only high dose vancomycin  
587 reduced microbiota density ( $p_{\text{low}} = 0.669$ ,  $p_{\text{high}} = 0.0127$ , final timepoint vs baseline, Mann Whitney;  
588 Figure S3G).

589

## 590 Supplemental figures

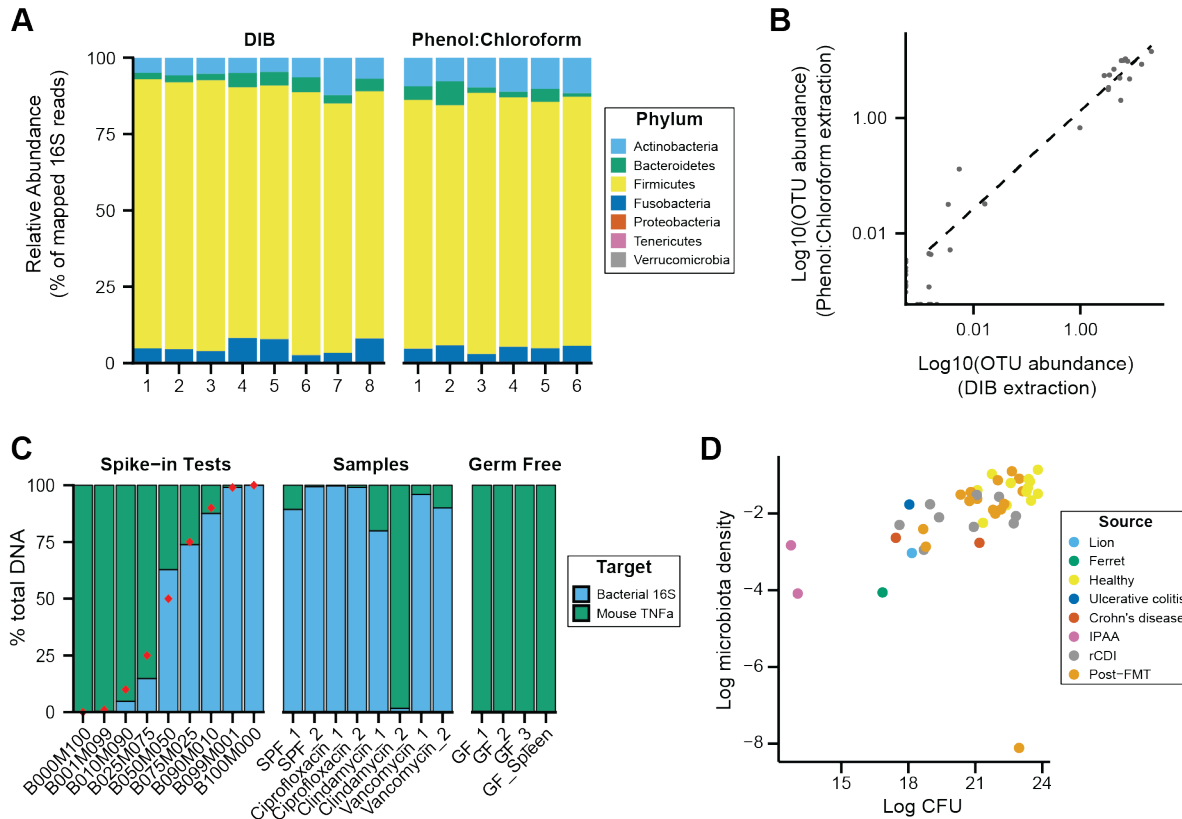

591

592 **Figure S1. DNase Inactivation Buffer DNA extraction method (DIB), phenol:chloroform**  
 593 **extraction, and culture-based measurements of microbiota density yield consistent results.**

594 We homogenized one dog fecal sample and created multiple aliquots for DNA extraction using either  
 595 the DIB or phenol:chloroform extraction methods.

596 **(A)** We do not observe evidence of bias introduced by the DNA extraction method chosen, as we  
 597 observe similar microbial compositions for the multiple aliquots, regardless of extraction method.

598 **(B)** Relative OTU abundances from DIB and phenol:chloroform extracted samples are highly  
 599 correlated ( $\rho = 0.904$ ,  $p = 1.82 \times 10^{-45}$ , Pearson's correlation). Dots represent average values of an  
 600 individual OTU abundance across several aliquots processed using each method ( $n = 8$  for DIB,  $n = 6$   
 601 for phenol:chloroform).

602 **(C)** We performed qPCR of host and bacterial fractions of mixed mouse/microbial DNA samples.  
 603 Spike-in samples with known fractions of mouse and bacterial DNA (e.g. B010M090 = 10% bacterial +  
 604 90% mouse) were quantified with qPCR to validate the potential to identify the origin of DNA in a  
 605 mixed sample. Samples from mouse fecal pellets across a variety of conditions show that the host  
 606 contribution to the extracted DNA is small, even for samples with low microbiota density. Red points  
 607 indicate the true spike-in percentage of bacterial DNA. GF\_1, GF\_2, GF\_3 are host DNA controls of  
 608 germ-free mouse feces. GF\_Spleen is a host DNA control from a germ-free mouse spleen.

609 **(D)** Estimates of microbiota density based on DNA content are correlated with estimates of microbiota  
610 density based CFUs from anaerobic culturing of fecal samples ( $\rho = 0.628$ ,  $p = 1.05 \times 10^{-5}$ , Spearman),  
611 regardless of the source of the fecal sample. Each dot represents one sample that was quantified in  
612 parallel by colony-forming unit assay and by DNA content quantification. Colors indicate the type of  
613 sample used.

614

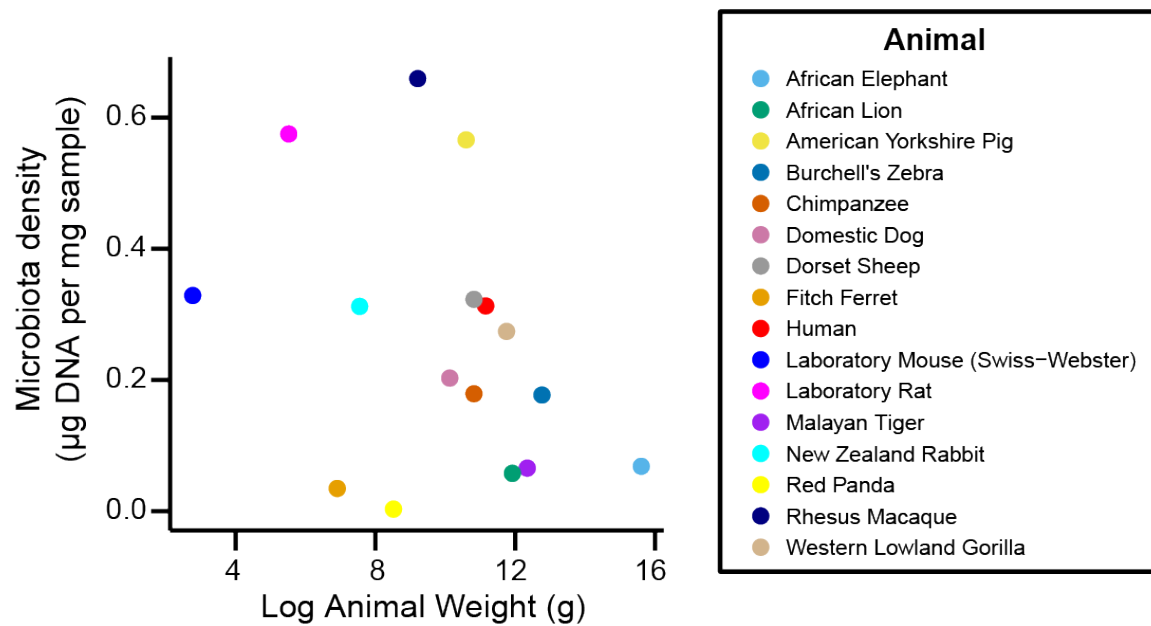

615

616 **Figure S2. Microbiota density is not correlated with body mass.**

617



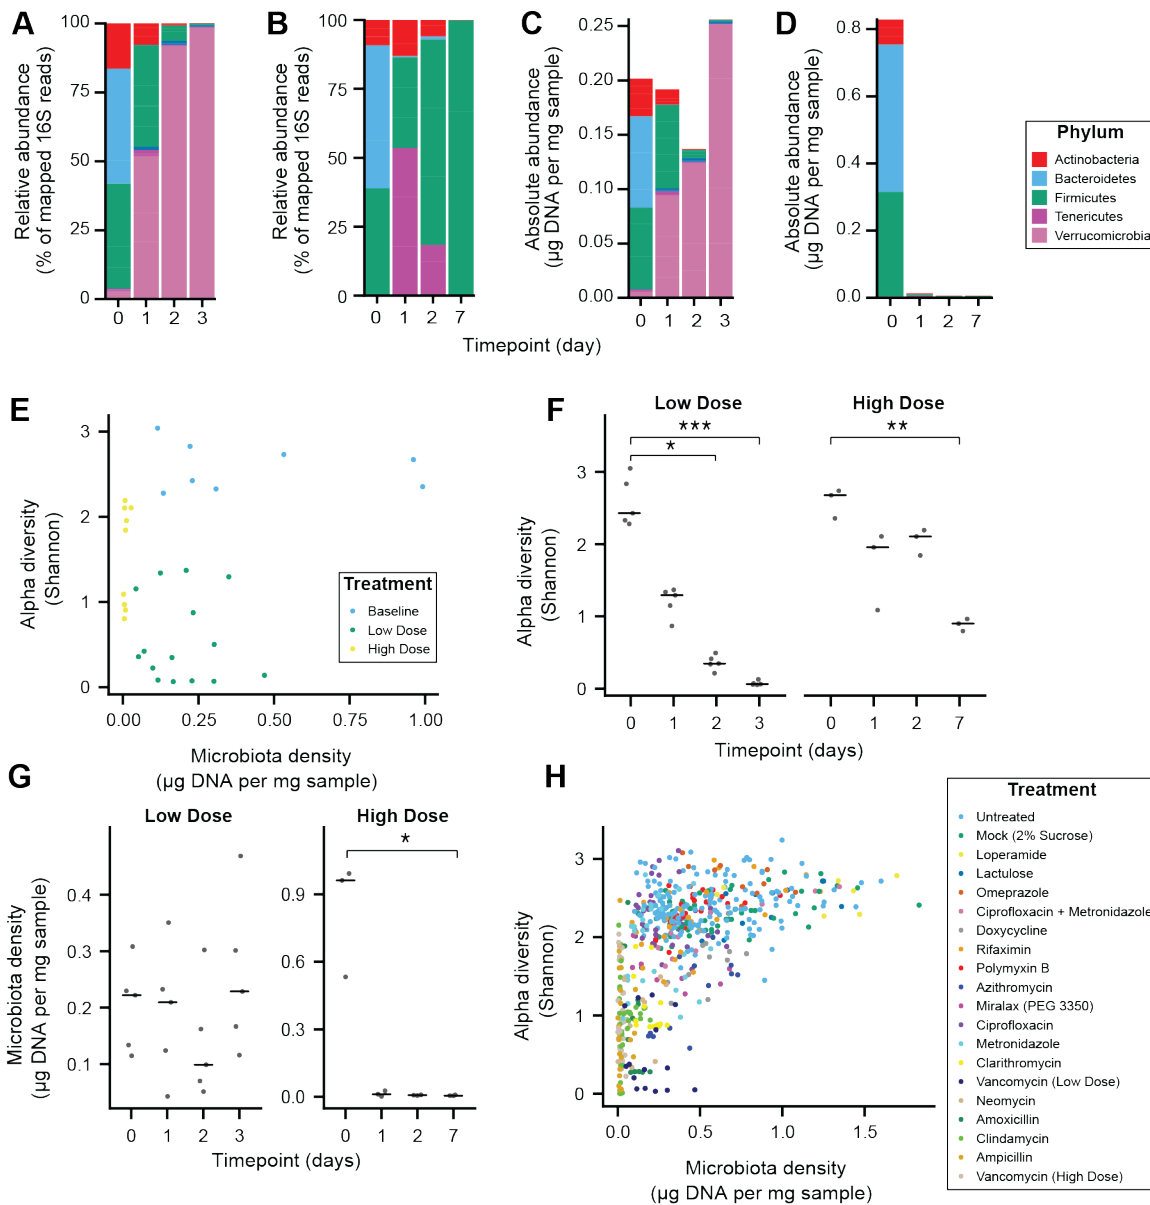

618

619 **Figure S3 Alteration of the absolute murine fecal microbiota by pharmacologics, and the**  
 620 **relationship between alpha diversity and microbiota density in pharmacologic interventions.**

621 (A-D) The relative abundances of the microbiota in SPF C57BL/6J mice treated with (A) low dose (n =  
 622 5) and (B) high-dose (n = 3) vancomycin are each dominated by a single phyla. Taking changes in  
 623 microbiota density into account, the absolute abundance of the microbiota at the phylum level in the  
 624 (C) low-dose vancomycin group demonstrates an expansion of Verrucomicrobia compared to  
 625 reduction of all phyla in the (D) high-dose vancomycin group.

626 (E) Changes in alpha diversity in response to high (0.5 mg/mL, n = 3) and low (0.2 mg/mL, n = 5)  
 627 dose vancomycin treatment do not correlate with the changes observed in microbiota density.

628 (F) Both low and high dose vancomycin treatment in mice reduce alpha diversity.

629 (G) Low dose vancomycin did not significantly alter microbiota density, while high dose vancomycin  
 630 reduced microbiota density to near zero.

631 (H) Across all tested pharmacologics, there was a significant correlation between microbiota density  
632 and alpha diversity as we never observed low alpha diversity with high density.  
633 In **F** and **G**, bars indicate median, \* $p < 0.05$ , \*\* $p < 0.01$ , and \*\*\* $p < 0.001$  (Kruskal-Wallis with Dunn's  
634 post-test corrected for multiple comparisons with the Bonferonni correction). In **E** and **H**, colors  
635 indicate treatment. For all, points represent individual samples.  
636

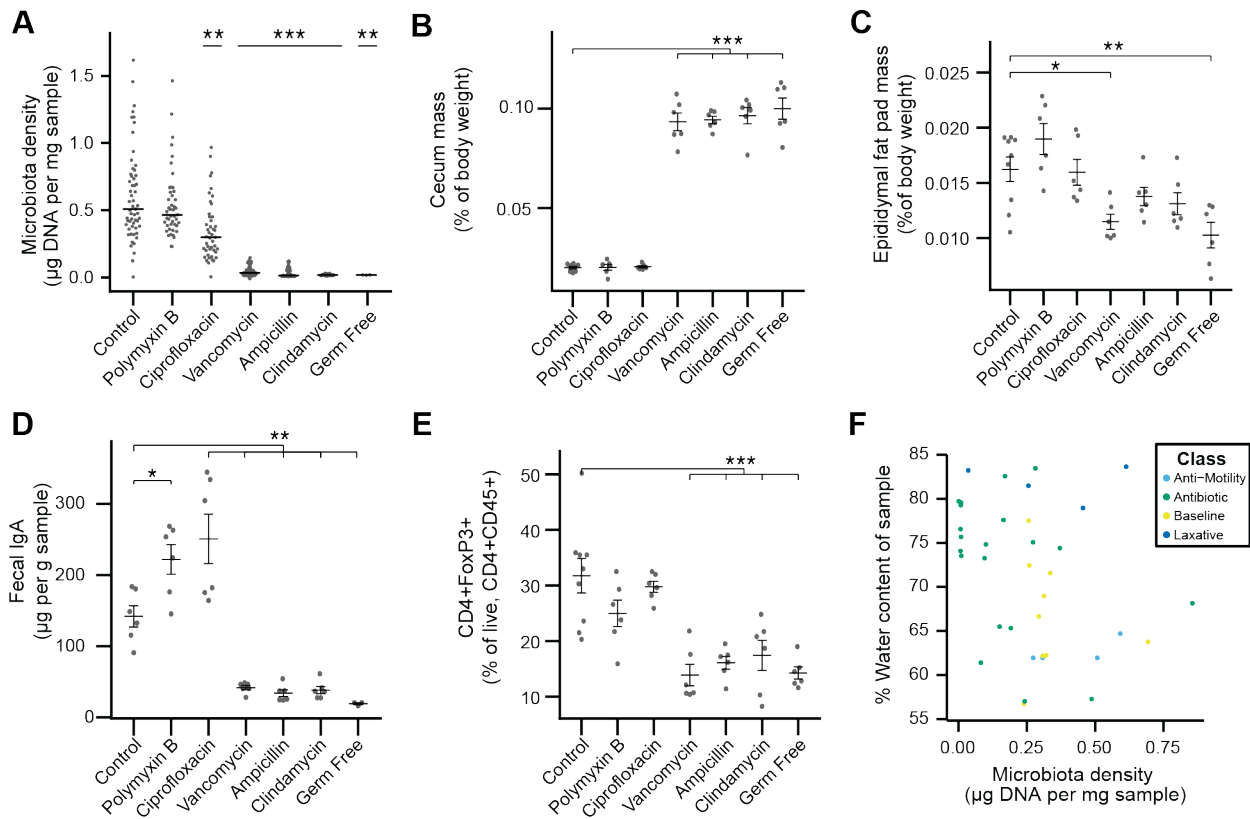

637

638 **Figure S4. Phenotypic changes observed in antibiotic-treated mice.**

639 (A) Microbial density changes observed in mice administered antibiotics *ad libitum* in drinking water  
640 for four weeks.

641 (B-E) The reduction in microbiota density results in changes in the (B) cecum size, (C) epididymal fat  
642 pad mass, (D) fecal IgA, and (E) colonic lamina propria FoxP3+ T regulatory cells.

643 (F) Across the microbiota changes induced by the pharmacologics, microbiota density and water  
644 content are not correlated.

645 In A, bars indicate median and nonparametric statistics used to test for significance vs control  
646 (Kruskal-Wallis with Dunn's post-test corrected for multiple comparisons with the Bonferonni  
647 correction). In B-E bars indicate mean  $\pm$  SEM and Dunnett's test used to test for significance. \*p <  
648 0.05, \*\*p < 0.01, \*\*\*p < 0.001 (Dunnett's test)

649

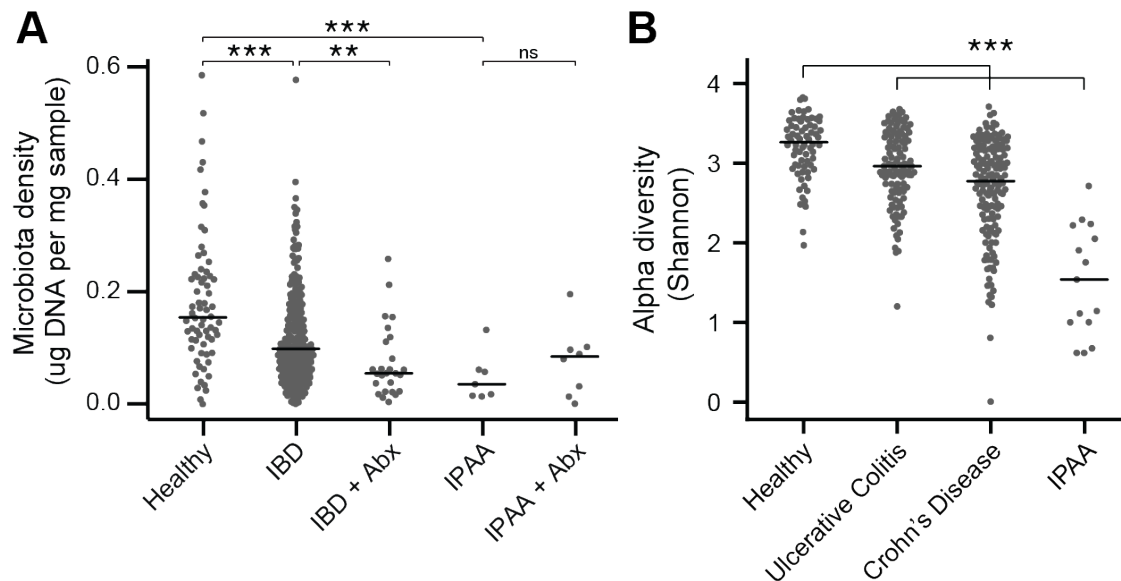

650

651 **Figure S5. The microbiota of IBD and IPAA subjects**

652 (A) Microbiota density is reduced in subjects with IBD and IPAA in the absence of antibiotic  
653 use. Nonetheless, the microbiota density of individuals with IBD on antibiotics was  
654 significantly lower for individuals with IBD on antibiotics.

655 (B) Alpha diversity is reduced in subjects with IBD relative to healthy controls

656 In A-B, bars indicate median, \*\*p < 0.01, \*\*\*p < 0.001, ns = not significant.

657

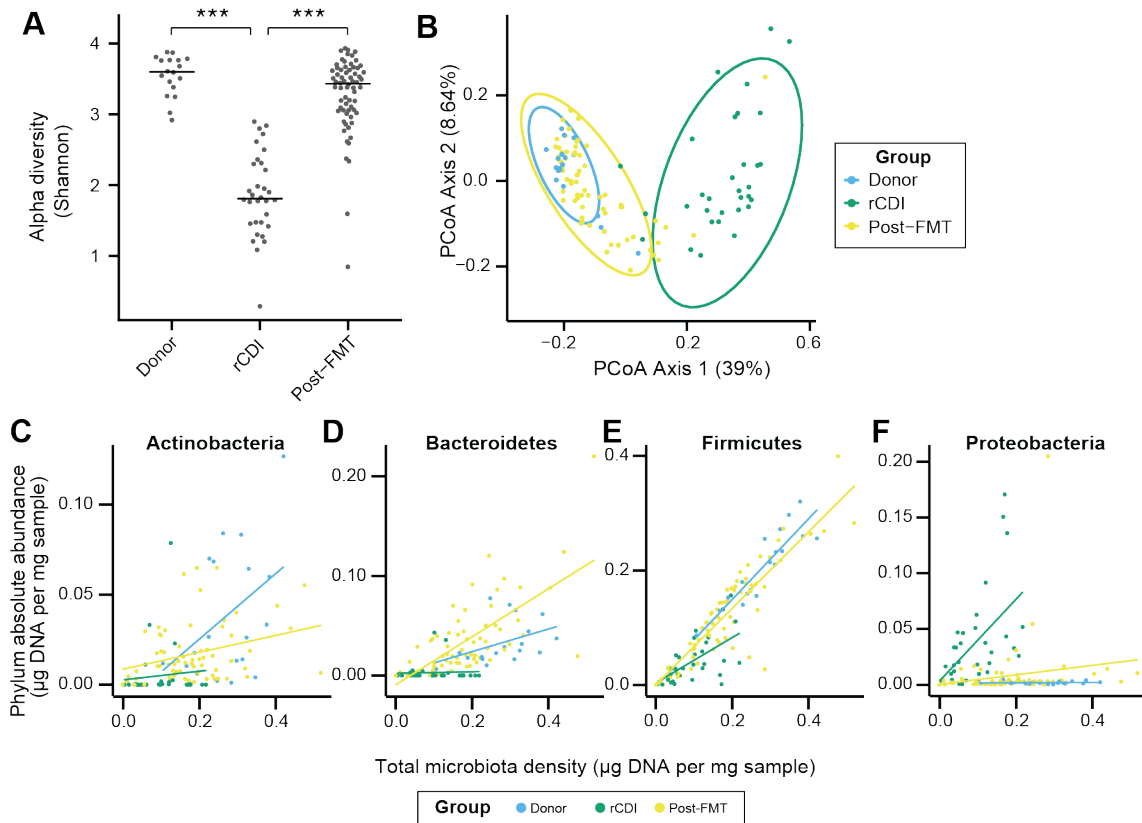

658

659 **Figure S6. FMT changes the microbiome of individuals with rCDI to resemble that of healthy**  
660 **donors.**

661 (A) Alpha diversity in rCDI is significantly lower than in healthy individuals used as FMT donors. This  
662 change in alpha diversity is restored by FMT.

663 (B) Principal coordinates analysis of unifracs distances based on the absolute abundances of OTUs in  
664 healthy FMT donors and rCDI before and after FMT.

665 (C-F) The rCDI microbiota density is driven largely by the abundance of Proteobacteria and  
666 Firmicutes. In healthy donors and individuals following FMT, Proteobacteria are present at a constant  
667 absolute abundance, and microbiota density is driven by Firmicutes, Bacteroidetes, and  
668 Actinobacteria. Points represent individual subjects and colors indicate their health status

669 In A, bars indicate median, \*\*\*p < 0.001. In B, points represent individual samples. Ellipses indicate  
670 the 95% confidence interval of distribution of points.

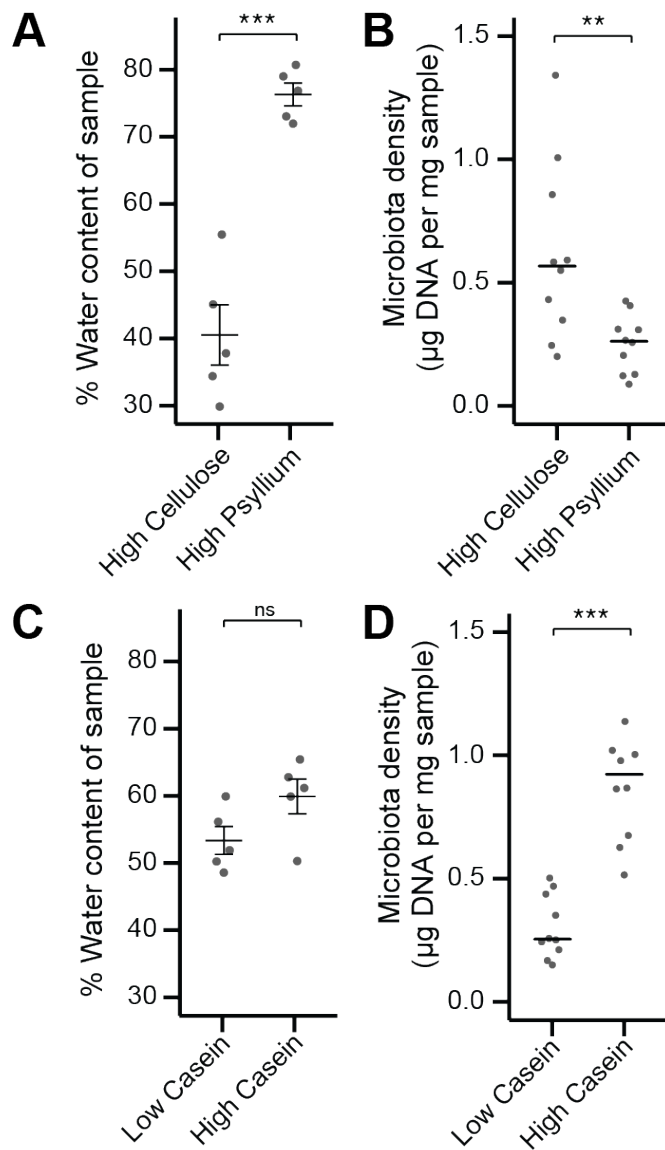

671

672 **Figure S7. Fecal water content and microbiota density can be manipulated independently by**  
673 **diet.**

674 (A) Water content of fecal samples from mice fed diets high in soluble fiber (psyllium) is greater than  
675 that of mice fed diets high in insoluble fiber (cellulose).

676 (B) There is no change in the water content of mice fed diets that vary in their protein content.

677 (C) Mice fed a diet high in soluble fiber had decreased microbiota density compared to mice fed a diet  
678 high in insoluble fiber.

679 (D) Protein content of the diet influences microbiota density, as shown in (12).

680 In A and B, bars indicate mean  $\pm$  SEM, and Student's t test was used to test for significance. In C and  
681 D, bars indicate median, and Wilcoxon rank sum test was used to test for significance; \*\*p < 0.01 and  
682 \*\*\*p < 0.001.

683

## 684 Supplemental tables

685 **Table S1. Mammalian sample information.**

686 **Table S2. Antibiotics used in mouse experiments.**

## 687 References

- 688 1. J. G. Caporaso *et al.*, QIIME allows analysis of high-throughput community sequencing data.  
689 *Nat. Methods.* **7**, 335–6 (2010).
- 690 2. P. D. Schloss *et al.*, Introducing mothur: Open-Source, Platform-Independent, Community-  
691 Supported Software for Describing and Comparing Microbial Communities. *Appl. Environ.*  
692 *Microbiol.* **75**, 7537–7541 (2009).
- 693 3. N. Segata *et al.*, Metagenomic microbial community profiling using unique clade-specific  
694 marker genes. *Nat. Methods.* **9**, 811–814 (2012).
- 695 4. B. M. Satinsky, S. M. Gifford, B. C. Crump, M. A. Moran, Use of Internal Standards for  
696 Quantitative Metatranscriptome and Metagenome Analysis. *Methods Enzymol.* **531**, 237–250  
697 (2013).
- 698 5. F. Stämmler *et al.*, Adjusting microbiome profiles for differences in microbial load by spike-in  
699 bacteria. *Microbiome.* **4**, 28 (2016).
- 700 6. M. A. Mahowald *et al.*, Characterizing a model human gut microbiota composed of members of  
701 its two dominant bacterial phyla. *Proc. Natl. Acad. Sci.* **106**, 5859–5864 (2009).
- 702 7. F. E. Rey *et al.*, Metabolic niche of a prominent sulfate-reducing human gut bacterium. *Proc.*  
703 *Natl. Acad. Sci.* **110**, 13582–13587 (2013).
- 704 8. R. Props *et al.*, Absolute quantification of microbial taxon abundances. *ISME J.* **11**, 584–587  
705 (2017).
- 706 9. A. Reyes, M. Wu, N. P. McNulty, F. L. Rohwer, J. I. Gordon, Gnotobiotic mouse model of  
707 phage-bacterial host dynamics in the human gut. *Proc. Natl. Acad. Sci. U. S. A.* **110**, 20236–41  
708 (2013).
- 709 10. D. Vandeputte *et al.*, Quantitative microbiome profiling links gut community variation to  
710 microbial load. *Nature.* **551**, 507 (2017).
- 711 11. J. J. Faith, N. P. McNulty, F. E. Rey, J. I. Gordon, Predicting a human gut microbiota's  
712 response to diet in gnotobiotic mice. *Science.* **333**, 101–4 (2011).

- 713 12. S. R. Llewellyn *et al.*, Interactions between diet and the intestinal microbiota alter intestinal  
714 permeability and colitis severity in mice. *Gastroenterology*. **0** (2017),  
715 doi:10.1053/j.gastro.2017.11.030.
- 716 13. H. Seedorf *et al.*, Bacteria from diverse habitats colonize and compete in the mouse gut. *Cell*.  
717 **159**, 253–66 (2014).
- 718 14. A. L. Goodman *et al.*, Extensive personal human gut microbiota culture collections  
719 characterized and manipulated in gnotobiotic mice. *Proc. Natl. Acad. Sci. U. S. A.* **108**, 6252–7  
720 (2011).
- 721 15. V. K. Ridaura *et al.*, Gut microbiota from twins discordant for obesity modulate metabolism in  
722 mice. *Science*. **341**, 1241214 (2013).
- 723 16. G. J. Britton *et al.*, Inflammatory bowel disease microbiotas alter gut CD4 T-cell homeostasis  
724 and drive colitis in mice. *bioRxiv*, 276774 (2018).
- 725 17. T. R. Sampson *et al.*, Gut Microbiota Regulate Motor Deficits and Neuroinflammation in a  
726 Model of Parkinson's Disease. *Cell*. **167**, 1469–1480.e12 (2016).
- 727 18. G. De Palma *et al.*, Transplantation of fecal microbiota from patients with irritable bowel  
728 syndrome alters gut function and behavior in recipient mice. *Sci. Transl. Med.* **9**, eaaf6397  
729 (2017).
- 730 19. E. Cekanaviciute *et al.*, Gut bacteria from multiple sclerosis patients modulate human T cells  
731 and exacerbate symptoms in mouse models. *Proc. Natl. Acad. Sci. U. S. A.* **114**, 10713–10718  
732 (2017).
- 733 20. K. Atarashi *et al.*, Induction of colonic regulatory T cells by indigenous *Clostridium* species.  
734 *Science*. **331**, 337–41 (2011).
- 735 21. F. Bäckhed *et al.*, The gut microbiota as an environmental factor that regulates fat storage.  
736 *Proc. Natl. Acad. Sci. U. S. A.* **101**, 15718–23 (2004).
- 737 22. D. Zhang *et al.*, Neutrophil ageing is regulated by the microbiome. *Nature*. **525**, 528–32 (2015).
- 738 23. G. Bongers *et al.*, Interplay of host microbiota, genetic perturbations, and inflammation  
739 promotes local development of intestinal neoplasms in mice. *J. Exp. Med.* **211**, 457–72 (2014).
- 740 24. J. J. Faith, P. P. Ahern, V. K. Ridaura, J. Cheng, J. I. Gordon, *Sci. Transl. Med.*, in press,  
741 doi:10.1126/scitranslmed.3008051.
- 742 25. M. B. Geuking *et al.*, Intestinal Bacterial Colonization Induces Mutualistic Regulatory T Cell  
743 Responses. *Immunity*. **34**, 794–806 (2011).



- 744 26. I. I. Ivanov *et al.*, Induction of Intestinal Th17 Cells by Segmented Filamentous Bacteria. *Cell*.  
745 **139**, 485–498 (2009).
- 746 27. A. Mortha *et al.*, Microbiota-Dependent Crosstalk Between Macrophages and ILC3 Promotes  
747 Intestinal Homeostasis. *Science (80-. )*. **343**, 1249288–1249288 (2014).
- 748 28. P. A. Muller *et al.*, Crosstalk between muscularis macrophages and enteric neurons regulates  
749 gastrointestinal motility. *Cell*. **158**, 300–13 (2014).
- 750 29. Wostmann B, E. Bruckner-Kardoss, Development of cecal distention in germ-free baby rats.  
751 *Am. J. Physiol.* **197**, 1345–6 (1959).
- 752 30. D. N. Frank *et al.*, Molecular-phylogenetic characterization of microbial community imbalances  
753 in human inflammatory bowel diseases. *Proc. Natl. Acad. Sci.* **104**, 13780–13785 (2007).
- 754 31. D. Gevers *et al.*, The treatment-naive microbiome in new-onset Crohn’s disease. *Cell Host*  
755 *Microbe*. **15**, 382–92 (2014).
- 756 32. U. Gophna, K. Sommerfeld, S. Gophna, W. F. Doolittle, S. J. O. Veldhuyzen Van Zanten,  
757 Differences between tissue-associated intestinal microfloras of patients with Crohn’s disease  
758 and ulcerative colitis. *J. Clin. Microbiol.* **44**, 4136–4141 (2006).
- 759 33. J. P. Jacobs *et al.*, A Disease-Associated Microbial and Metabolomics State in Relatives of  
760 Pediatric Inflammatory Bowel Disease Patients. *Cell. Mol. Gastroenterol. Hepatol.* **2**, 750–766  
761 (2016).
- 762 34. A. M. Seekatz *et al.*, Recovery of the gut microbiome following fecal microbiota transplantation.  
763 *MBio*. **5**, e00893-14 (2014).
- 764 35. V. Shankar *et al.*, Species and genus level resolution analysis of gut microbiota in *Clostridium*  
765 *difficile* patients following fecal microbiota transplantation. *Microbiome*. **2**, 13 (2014).
- 766 36. C. F. Maurice, H. J. Haiser, P. J. Turnbaugh, Xenobiotics shape the physiology and gene  
767 expression of the active human gut microbiome. *Cell*. **152**, 39–50 (2013).
- 768 37. P. I. Costea *et al.*, Towards standards for human fecal sample processing in metagenomic  
769 studies. *Nat. Biotechnol.* **35**, 1069–1076 (2017).
- 770 38. R. Sinha *et al.*, Assessment of variation in microbial community amplicon sequencing by the  
771 Microbiome Quality Control (MBQC) project consortium. *Nat. Biotechnol.* **35**, 1077–1086  
772 (2017).
- 773 39. G. Falony *et al.*, Population-level analysis of gut microbiome variation. *Science*. **352**, 560–4  
774 (2016).

- 775 40. D. Vandeputte, G. Falony, K. D'hoë, S. Vieira-Silva, J. Raes, Water activity does not shape the  
776 microbiota in the human colon. *Gut*. **66**, 1865–1866 (2017).
- 777 41. E. D. Sonnenburg *et al.*, Diet-induced extinctions in the gut microbiota compound over  
778 generations. *Nature*. **529**, 212–215 (2016).
- 779 42. M. S. Roberts, J. L. Gittleman, *Ailurus fulgens*. *Mamm. Species*, 1–8 (1984).
- 780 43. P. R. S. Blandford, Biology of the Polecat *Mustela putorius*: a literature review. *Mamm. Rev.* **17**,  
781 155–198 (2018).
- 782 44. T. Garland, The relation between maximal running speed and body mass in terrestrial  
783 mammals. *J. Zool.* **199**, 157–170.
- 784 45. L. J. E., Primate digestion: Interactions among anatomy, physiology, and feeding ecology. *Evol.*  
785 *Anthropol. Issues, News, Rev.* **7**, 8–20 (1998).
- 786 46. P. Ebinger, A cytoarchitectonic volumetric comparison of brains in wild and domestic sheep. *Z.*  
787 *Anat. Entwicklungsgesch.* **144**, 267–302 (1974).
- 788 47. R. J. Smith, W. L. Jungers, Body mass in comparative primatology. *J. Hum. Evol.* **32**, 523–559  
789 (1997).
- 790 48. R. P. Hirten *et al.*, Microbial Engraftment and Efficacy of Fecal Microbiota Transplant for  
791 *Clostridium difficile* Patients With and Without IBD. *bioRxiv*, 267492 (2018).
- 792 49. J. J. Faith *et al.*, The long-term stability of the human gut microbiota. *Science*. **341**, 1237439  
793 (2013).
- 794 50. R. T. Hinnant, M. M. Kothmann, Collecting, drying, and preserving feces for chemical and  
795 microhistological analysis. *J. Range Manag.* **41**, 168–171 (1988).
- 796 51. H. U. Bryant, C. C. Kuta, J. A. Story, G. K. W. Yim, Stress- and morphine-induced elevations of  
797 plasma and tissue cholesterol in mice: reversal by naltrexone. *Biochem. Pharmacol.* **37**, 3777–  
798 80 (1988).
- 799 52. P. C. Kashyap *et al.*, Complex interactions among diet, gastrointestinal transit, and gut  
800 microbiota in humanized mice. *Gastroenterology*. **144**, 967–77 (2013).
- 801 53. H. Larsson *et al.*, Inhibition of gastric acid secretion by omeprazole in the dog and rat.  
802 *Gastroenterology*. **85**, 900–7 (1983).
- 803 54. S. Vaishnava *et al.*, The Antibacterial Lectin RegIII Promotes the Spatial Segregation of  
804 Microbiota and Host in the Intestine. *Science (80-. )*. **334**, 255–258 (2011).

- 805 55. F. Sievers *et al.*, Fast, scalable generation of high-quality protein multiple sequence alignments  
806 using Clustal Omega. *Mol. Syst. Biol.* **7**, 539 (2011).
- 807 56. T. Magoč, S. L. Salzberg, FLASH: fast length adjustment of short reads to improve genome  
808 assemblies. *Bioinformatics.* **27**, 2957–63 (2011).
- 809 57. T. Z. DeSantis *et al.*, Greengenes, a Chimera-Checked 16S rRNA Gene Database and  
810 Workbench Compatible with ARB. *Appl. Environ. Microbiol.* **72**, 5069–5072 (2006).
- 811 58. D. McDonald *et al.*, An improved Greengenes taxonomy with explicit ranks for ecological and  
812 evolutionary analyses of bacteria and archaea. *ISME J.* **6**, 610–8 (2012).
- 813 59. R Core Team, R: A language and environment for statistical computing (2017), (available at  
814 <https://www.r-project.org/>).
- 815 60. P. J. McMurdie, S. Holmes, phyloseq: an R package for reproducible interactive analysis and  
816 graphics of microbiome census data. *PLoS One.* **8**, e61217 (2013).
- 817 61. D. H. Ogle, FSA: Fisheries Stock Analysis (2018).
- 818 62. T. Hothorn, F. Bretz, P. Westfall, Simultaneous Inference in General Parametric Models.  
819 *Biometrical J.* **50**, 346–363 (2008).
- 820 63. D. A. Relman, T. M. Schmidt, R. P. MacDermott, S. Falkow, Identification of the Uncultured  
821 *Bacillus* of Whipple's Disease. *N. Engl. J. Med.* **327**, 293–301 (1992).
- 822 64. A. Nitsche *et al.*, Quantification of human cells in NOD/SCID mice by duplex real-time  
823 polymerase-chain reaction. *Haematologica.* **86** (2001).
- 824 65. L. Dethlefsen, S. Huse, M. L. Sogin, D. A. Relman, The pervasive effects of an antibiotic on the  
825 human gut microbiota, as revealed by deep 16S rRNA sequencing. *PLoS Biol.* **6**, e280 (2008).
- 826
